# Supplementary material for: Indole-3-acetic acid synthesized through the indole-3-pyruvate pathway promotes Candida tropicalis biofilm formation
Source: PLoS One. 2020 Dec 17;15(12):e0244246. doi: 10.1371/journal.pone.0244246 (PMC7746184; doi:10.1371/journal.pone.0244246)
Supplement: S1 Table — (XLSX) [file pone.0244246.s002.xlsx]

## Sheet: output file from perseus.with.R
	S1 Table. Metabolites identified
	Log2 normalized intensity																Mean Log2 normalized intensity						ANOVA				*Rank (1 = most intense, 5 = least intense)
Metabolite.IDs	Medium_01	Medium_02	Medium_03	CT_01	CT_02	CT_03	EC_01	EC_02	EC_03	SM_01	SM_02	SM_03	CTECSM_01	CTECSM_02	CTECSM_03		Medium	CT	EC	SM	CTECSM		-Log10 p-value	q-value	Significant		Medium	CT	EC	SM	CTECSM
Glyoxylic acid-meto-TMS	-11.7887	-15.7376	-14.6359	-7.74089	-7.51294	-7.62323	-12.2975	-8.54994	-8.56467	-16.2274	-8.54584	-8.4699	-11.0336	-15.6437	-8.29645		-14.0541	-7.62569	-9.80404	-11.0811	-11.6579		0.761347	0.0694513			5	1	2	3	4
Pyruvic acid-meto-TMS	-10.491	-10.3174	-10.1933	-4.51003	-4.34345	-4.46078	-3.72035	-3.66786	-3.67599	-2.43271	-2.43975	-2.41389	-9.33311	-9.27899	-9.45648		-10.3339	-4.43809	-3.68807	-2.42879	-9.35619		15.6713	0	+		5	3	2	1	4
Lactic acid-2TMS	-1.83013	-1.66014	-1.78176	-1.46906	-1.35826	-1.39881	-14.5274	-13.8455	-13.5375	-14.2267	-15.7759	-16.0034	-12	-14.2143	-12.1364		-1.75734	-1.40871	-13.9701	-15.3353	-12.7836		9.32111	0	+		2	1	4	5	3
2-Hydroxyisobutyric acid-2TMS	-11.2727	-10.9042	-10.8364	-11.0239	-14.5451	-11.0722	-15.2768	-15.1186	-15.1435	-14.9886	-13.2814	-13.2648	-11.8919	-12.2956	-13.6599		-11.0045	-12.2137	-15.1796	-13.8449	-12.6158		2.09561	0.00315084	+		1	2	5	4	3
Caproic acid-TMS	-8.54053	-7.52118	-8.18571	-8.37344	-8.04175	-7.67589	-7.7002	-7.21432	-8.4966	-7.14815	-8.41772	-7.46832	-6.9437	-7.02477	-8.06503		-8.08247	-8.03036	-7.80371	-7.67806	-7.3445		0.26358	0.368357			5	4	3	2	1
Glycolic acid-2TMS	-5.36602	-5.19015	-5.2816	-5.94149	-5.80185	-5.87668	-4.99824	-4.94304	-4.94543	-4.96645	-4.97537	-4.92312	-4.99096	-4.99089	-5.04192		-5.27925	-5.87334	-4.96223	-4.95498	-5.00792		8.16231	0	+		4	5	2	1	3
Alanine-2TMS	0.788435	0.879162	0.795557	0.653582	0.763343	0.13815	0.935541	0.892429	1.01341	0.962951	1.0921	0.916771	-0.238135	-0.269246	-0.124399		0.821051	0.518358	0.947128	0.990608	-0.210593		4.68558	0	+		3	4	2	1	5
2-Keto-isovaleric acid-meto-TMS	-13.1726	-13.7563	-17.3433	-7.86073	-7.85677	-7.94331	-9.23662	-9.27986	-9.31068	-10.1333	-10.165	-10.2316	-13.0978	-13.9177	-14.226		-14.7574	-7.88694	-9.27572	-10.1767	-13.7472		4.38428	0	+		5	1	2	3	4
Hydroxylamine-3TMS	-0.779077	-0.72173	-0.969922	-0.65537	-1.01385	-0.575104	-0.790924	-0.96538	-0.66368	-0.516281	-0.930023	-0.355582	-0.52534	-1.27798	-0.695552		-0.823577	-0.748108	-0.806661	-0.600629	-0.832958		0.0985805	0.688373			4	2	3	1	5
Glycine-2TMS	-7.12743	-7.55152	-8.03069	-8.24751	-7.2241	-8.24422	-7.85686	-7.57244	-7.56981	-7.75185	-7.37245	-7.47528	-8.32686	-7.84545	-8.26221		-7.56988	-7.90528	-7.66637	-7.53319	-8.14484		0.541006	0.120751			2	4	3	1	5
2-Hydroxybutyric acid-2TMS	-9.60691	-9.8014	-9.95793	-9.90543	-9.35749	-9.961	-10.0768	-9.78025	-9.80638	-9.73374	-9.67514	-9.5479	-8.40712	-8.36958	-8.47157		-9.78875	-9.74131	-9.8878	-9.65226	-8.41609		4.87887	0	+		4	3	5	2	1
Oxalic acid-2TMS	-10.0633	-10.345	-10.1884	-9.57362	-9.22321	-9.57051	-12.3937	-12.587	-14.7117	-16.5418	-14.4243	-14.0586	-12.1025	-7.64466	-12.8439		-10.1989	-9.45578	-13.2308	-15.0083	-10.8637		2.22438	0.0022659	+		2	1	4	5	3
Sarcosine-d3-2TMS	-10.1484	-16.1361	-10.0671	-10.2781	-14.4423	-15.5737	-15.5108	-14.8446	-10.5102	-14.3704	-13.0964	-14.8403	-12.0379	-14.2403	-12.7522		-12.1172	-13.4313	-13.6219	-14.1024	-13.0101		0.0553072	0.812648			1	3	4	5	2
3-Hydroxypropionic acid-2TMS	-4.70703	-4.56098	-4.66312	-4.24048	-4.10276	-4.24093	-4.39249	-4.35226	-4.31776	-4.41545	-4.41139	-4.3639	-3.01291	-3.01749	-3.0326		-4.64371	-4.19472	-4.35417	-4.39691	-3.021		10.3893	0	+		5	2	3	4	1
Pyruvic acid-oxime-2TMS	-14.6279	-10.4893	-10.6325	-10.3108	-10.2081	-10.2922	-10.1915	-10.3763	-10.1792	-9.81394	-9.70044	-9.76953	-10.3809	-13.097	-10.5998		-11.9166	-10.2704	-10.249	-9.7613	-11.3592		0.573686	0.110777			5	3	2	1	4
3-Hydroxyisobutyric acid-2TMS	-14.7659	-13.6484	-14.3826	-8.5024	-13.943	-15.3805	-14.9371	-14.1637	-15.4213	-8.96434	-12.2109	-13.4545	-6.89825	-6.85295	-6.91409		-14.2656	-12.6086	-14.8407	-11.5432	-6.88843		2.38818	0.0016527	+		4	3	5	2	1
2-Hydroxyisovaleric acid-2TMS	-9.84946	-12.5146	-9.77835	-8.99158	-8.85625	-8.87173	-8.30012	-8.25633	-8.29403	-9.54758	-9.49688	-9.4853	-5.22127	-5.21336	-5.26543		-10.7141	-8.90652	-8.28349	-9.50992	-5.23336		4.52551	0	+		5	3	2	4	1
2-Aminobutyric acid-2TMS	-9.98247	-10.1533	-10.3841	-10.119	-10.5188	-10.8025	-10.3801	-10.5198	-10.1679	-9.77437	-9.4649	-9.92645	-10.1256	-10.4673	-10.5465		-10.1733	-10.4801	-10.3559	-9.72191	-10.3798		1.63809	0.00810417	+		2	5	3	1	4
3-Methyl-2-oxovaleric acid-meto-TMS(1)	-14.105	-15.7225	-15.0865	-5.96795	-5.83751	-5.97703	-7.88494	-7.31193	-7.33446	-8.85215	-8.64621	-8.71676	-9.49912	-9.26517	-9.1878		-14.9713	-5.92749	-7.51044	-8.73838	-9.31736		8.94473	0	+		5	1	2	3	4
3-Aminopropanoic acid-2TMS	-11.7722	-12.6903	-13.5998	-14.6142	-14.0268	-14.8961	-12.3634	-15.2816	-11.7535	-13.0866	-11.1627	-13.9654	-15.1112	-13.7608	-14.5718		-12.6874	-14.5124	-13.1328	-12.7382	-14.4813		0.676958	0.0848983			1	5	3	2	4
3-Methyl-2-oxovaleric acid-meto-TMS(2)	-12.6106	-15.9048	-14.1624	-7.8121	-7.66726	-7.79782	-9.22717	-9.16391	-9.12322	-10.2265	-10.0613	-10.142	-10.1312	-10.1947	-10.1955		-14.226	-7.75906	-9.17143	-10.1433	-10.1738		4.93632	0	+		5	1	2	3	4
Glyceraldehyde-meto-2TMS(1)	-15.5452	-10.9631	-11.5407	-10.4586	-13.6646	-14.5007	-12.8164	-14.3168	-10.6271	-12.51	-15.7646	-15.6364	-12.6549	-11.4993	-13.1786		-12.683	-12.8746	-12.5868	-14.637	-12.4442		0.201141	0.469925			3	4	2	5	1
3-Aminoisobutyric acid-2TMS	-11.9213	-12.0264	-12.1789	-12.1115	-12.6201	-12.6487	-12.007	-11.8844	-11.9868	-11.5617	-11.7718	-12.0343	-11.7867	-11.5951	-11.9667		-12.0422	-12.4601	-11.9594	-11.7893	-11.7828		1.91856	0.00456522	+		4	5	3	2	1
3-Hydroxyisovaleric acid-2TMS	-5.93097	-5.85812	-5.94692	-5.7968	-5.68188	-5.80671	-5.8101	-5.73121	-5.72453	-5.69858	-5.75257	-5.68717	-5.56504	-5.59729	-5.58611		-5.912	-5.7618	-5.75528	-5.71277	-5.58281		3.96769	0	+		5	4	3	2	1
Valine-2TMS	-14.0967	-14.2959	0.411359	0.5703	0.6352	0.21553	0.596999	0.515184	-16.0726	-13.3256	-11.9601	-12.4073	0.750496	0.734737	-13.4183		-9.32707	0.473676	-4.98681	-12.5643	-3.97769		0.622802	0.0971333			4	1	3	5	2
2-Ketoisocaproic acid-meto-TMS(2)	-11.6632	-11.1806	-10.8839	-4.81177	-4.67719	-4.80471	-14.1839	-6.74606	-6.73826	-7.15329	-7.11246	-7.07724	-7.90356	-13.9194	-14.5341		-11.2426	-4.76456	-9.22275	-7.11433	-12.119		1.53649	0.00988	+		4	1	3	2	5
Glyceraldehyde-meto-2TMS(2)	-14.1025	-13.7162	-13.0736	-13.9199	-14.27	-14.8558	-13.5733	-14.3388	-14.1012	-15.8766	-12.3936	-15.1021	-4.7237	-4.78454	-4.78882		-13.6308	-14.3486	-14.0044	-14.4574	-4.76568		6.4239	0	+		2	4	3	5	1
Dihydroxyacetone-2TMS	-13.4226	-14.611	-14.4965	-13.424	-10.2168	-14.504	-9.95233	-10.043	-10.1055	-14.9976	-15.2243	-14.944	-9.78338	-12.2104	-15.2159		-14.1767	-12.7149	-10.0336	-15.0553	-12.4032		1.55796	0.00941414	+		4	3	1	5	2
2-Hydroxyisocaproic acid-2TMS	-10.9737	-10.9954	-11.2738	-9.50911	-9.28829	-9.37179	-8.49808	-8.42636	-8.4282	-10.6558	-10.4064	-10.6303	-4.85364	-4.91299	-4.88757		-11.081	-9.38973	-8.45088	-10.5641	-4.88474		13.0597	0	+		5	3	2	4	1
Norvaline-2TMS	-14.3808	-14.2569	-11.7317	-14.5394	-14.8201	-14.7133	-9.10497	-9.12427	-8.92606	-9.57358	-8.72978	-13.8374	-8.65785	-8.75496	-8.91026		-13.4565	-14.691	-9.05177	-10.7136	-8.77436		2.91047	0.000526316	+		4	5	2	3	1
Urea-2TMS	-6.31269	-4.25234	-11.8933	-0.769209	-0.609605	-0.773793	-0.326722	-0.399648	-0.256974	-9.31014	-3.23969	-3.42028	1.25052	1.3014	1.161		-7.48611	-0.717536	-0.327781	-5.32337	1.23764		2.32078	0.0019645	+		5	3	2	4	1
Dihydroxyacetone-meto-2TMS	-7.55541	-7.39615	-7.45254	-13.3292	-12.3655	-14.1175	-14.6475	-13.3822	-14.5476	-6.74882	-6.66975	-6.69191	-14.6692	-15.1015	-13.1121		-7.46804	-13.2707	-14.1924	-6.7035	-14.2943		7.07773	0	+		2	3	4	1	5
Serine-2TMS	-6.13844	-5.60056	-5.65517	-9.26274	-8.73262	-8.65272	-10.789	-10.6335	-10.8941	-10.6429	-10.751	-10.3769	-10.2444	-10.5542	-10.2728		-5.79806	-8.88269	-10.7722	-10.5902	-10.3571		9.08591	0	+		1	2	5	4	3
Benzoic acid-TMS	-4.77023	-4.72591	-4.71156	-4.66301	-4.48881	-4.62312	-4.78853	-4.75324	-4.76075	-4.72598	-4.72883	-4.66537	-4.32492	-4.28982	-4.325		-4.7359	-4.59164	-4.76751	-4.70673	-4.31324		5.66328	0	+		4	2	5	3	1
2-Aminoethanol-3TMS	-3.66817	-3.49045	-3.54348	-3.49851	-3.42229	-3.48174	-3.23914	-3.25615	-3.18613	-2.50055	-2.49987	-2.48539	-2.24543	-2.34154	-2.25245		-3.56737	-3.46751	-3.22714	-2.49527	-2.27981		10.0334	0	+		5	4	3	2	1
Glycerol-3TMS	-4.37298	-12.9612	-4.14156	-15.3293	-13.2708	-15.1739	-12.6426	-12.8722	-14.5158	-4.19107	-4.33484	-4.17987	-13.2542	-5.0318	-4.60685		-7.1586	-14.5913	-13.3435	-4.23526	-7.63094		1.9143	0.0046054	+		2	5	4	1	3
Octanoic acid-TMS	-8.74829	-6.60257	-8.35121	-8.49239	-8.13508	-8.41371	-8.52373	-8.18649	-8.85954	-8.39021	-8.45607	-8.46599	-8.00433	-8.00608	-8.08664		-7.90069	-8.34706	-8.52325	-8.43743	-8.03235		0.233688	0.415538			1	3	5	4	2
Leucine-2TMS	-10.8445	-11.7941	-11.9377	-12.8162	-15.7317	0.694328	-12.1489	-14.0968	-13.7573	-15.6802	-12.8368	-14.7816	0.773751	0.917637	0.786807		-11.5254	-9.2845	-13.3343	-14.4329	0.826065		2.22616	0.00227907	+		3	2	4	5	1
Isoleucine-2TMS	0.332082	0.248937	0.0964137	0.272023	0.294564	-0.348448	0.116897	-0.167564	0.33274	0.195593	0.53932	0.0715882	-0.0650469	0.203903	0.221753		0.225811	0.0727132	0.0940243	0.268834	0.120203		0.0862023	0.72			2	5	4	1	3
Acetylglycine-TMS	-9.80012	-9.39857	-9.54602	-9.66178	-9.36847	-9.8075	-9.78555	-9.82405	-9.66856	-9.40201	-9.46432	-9.30835	-8.84803	-8.73653	-8.85054		-9.58157	-9.61258	-9.75939	-9.39156	-8.8117		3.93947	0	+		3	4	5	2	1
Proline-2TMS	-1.46019	-1.72539	-1.97062	-2.49614	-2.58536	-3.49599	-2.11991	-2.49269	-1.91224	-1.94896	-1.29346	-2.10248	-5.89906	-5.68073	-5.5236		-1.71873	-2.85916	-2.17495	-1.78164	-5.70113		6.25617	0	+		1	4	3	2	5
4-Aminobutyric acid-2TMS	-15.4086	-13.8052	-14.4413	-12.6959	-13.2292	-14.2999	-8.15856	-13.96	-7.51394	-15.7	-15.8509	-14.6447	-14.0994	-14.4393	-13.4103		-14.5517	-13.4083	-9.87749	-15.3985	-13.983		1.6474	0.00808377	+		4	2	1	5	3
Glycine-3TMS	0.460168	0.536708	0.466374	0.422918	0.677207	0.493711	0.793383	0.803981	0.813874	0.609741	0.707808	0.64251	-0.174485	-0.173284	-0.157426		0.48775	0.531279	0.803746	0.653353	-0.168398		7.20955	0	+		4	3	1	2	5
Maleic acid-2TMS	-10.1566	-10.0784	-10.3599	-10.5671	-10.4932	-10.8903	-11.2233	-11.2509	-10.6816	-10.5992	-11.3874	-10.4334	-11.3748	-10.8207	-10.8511		-10.1983	-10.6502	-11.052	-10.8067	-11.0155		1.28153	0.0183269	+		1	2	5	3	4
Nicotinic acid-TMS	-6.36443	-6.37401	-6.43528	-5.61435	-5.43317	-5.61889	-5.728	-5.71699	-5.69773	-5.65906	-5.62024	-5.63088	-5.32035	-5.29014	-5.318		-6.39124	-5.55547	-5.71424	-5.63673	-5.3095		8.54129	0	+		5	2	4	3	1
Phenylacetic acid-TMS	-7.83519	-7.71355	-7.75801	-7.20115	-7.04034	-7.23851	-13.3896	-14.3458	-12.4119	-7.15035	-7.13917	-7.07544	-8.18912	-8.17663	-8.19981		-7.76891	-7.16	-13.3824	-7.12166	-8.18852		7.49582	0	+		3	2	5	1	4
Succinic acid-2TMS	-3.66785	-3.58398	-3.67639	-2.20969	-2.06226	-2.21012	0.768	0.726469	0.789027	-0.0581148	-0.0204623	0.0329104	-5.27796	-5.23426	-5.27554		-3.64274	-2.16069	0.761165	-0.0152222	-5.26259		16.4202	0	+		4	3	1	2	5
Glyceric acid-3TMS	-4.14186	-4.07949	-4.14356	-4.43778	-4.27066	-4.4194	-3.89243	-3.88576	-3.87475	-6.18275	-6.10163	-6.09359	-5.20613	-5.15168	-5.11339		-4.12164	-4.37595	-3.88431	-6.12599	-5.15707		11.9354	0	+		2	3	1	5	4
Methylsuccinic acid-2TMS	-11.9539	-12.3601	-12.5637	-14.9876	-14.1136	-13.1221	-10.2819	-10.3386	-10.3551	-12.2153	-12.3228	-12.5094	-10.0715	-10.0723	-9.94541		-12.2926	-14.0744	-10.3252	-12.3492	-10.0298		5.46986	0	+		3	5	2	4	1
Uracil-2TMS	-5.78967	-5.75232	-5.78725	-7.35136	-7.19207	-7.42641	-8.84326	-8.86037	-8.74601	-6.73806	-6.66754	-6.63772	-7.16725	-7.10367	-7.09799		-5.77641	-7.32328	-8.81655	-6.68111	-7.12297		11.7879	0	+		1	4	5	2	3
Serine-3TMS	-0.934817	-1.33993	-1.54998	-3.99731	-3.83229	-4.62465	-6.25544	-6.56965	-6.06772	-5.95095	-5.42475	-6.10705	-7.12119	-6.37762	-6.4706		-1.27491	-4.15142	-6.29761	-5.82758	-6.65647		7.62285	0	+		1	2	4	3	5
Fumaric acid-2TMS	-5.65948	-5.55099	-5.65453	-4.68007	-4.54381	-4.8767	-5.52983	-5.64566	-5.31767	-4.04705	-3.88823	-4.02154	-5.95242	-5.55793	-5.49477		-5.62167	-4.70019	-5.49772	-3.98561	-5.66837		6.32835	0	+		4	2	3	1	5
Homoserine-2TMS	-8.87877	-8.28136	-8.5141	-9.94979	-9.84286	-9.55102	-9.47142	-9.23087	-9.76152	-8.38483	-8.64671	-8.33557	-8.92026	-8.83918	-9.1653		-8.55808	-9.78122	-9.48794	-8.45571	-8.97492		3.94785	0	+		2	5	4	1	3
Nonanoic acid-TMS	-6.57031	-4.52489	-6.18281	-6.46759	-5.76555	-6.35088	-6.27172	-6.24191	-6.48106	-6.49307	-6.31513	-6.32006	-6.03866	-6.16823	-5.9126		-5.75934	-6.19467	-6.33156	-6.37608	-6.03983		0.209825	0.455197			1	3	4	5	2
Threonine-3TMS	-2.33966	-2.72663	-2.96716	-5.26321	-5.15356	-5.85746	-4.92872	-5.33176	-4.75576	-2.84622	-2.44952	-3.02053	-8.97198	-8.62151	-8.57853		-2.67782	-5.42474	-5.00542	-2.77209	-8.72401		8.73977	0	+		1	4	3	2	5
O-Acetylserine-2TMS	-14.44	-14.4329	-12.6048	-15.5104	-15.1261	-12.4335	-6.0501	-6.42049	-5.85953	-6.03988	-5.72581	-6.20595	-14.6846	-12.3565	-13.9919		-13.8259	-14.3567	-6.11004	-5.99054	-13.6777		5.90287	0	+		4	5	2	1	3
Thymine-2TMS	-7.91592	-7.84947	-7.98012	-7.59575	-7.55507	-7.68457	-7.13543	-7.1596	-7.12162	-6.92026	-6.83236	-6.8687	-6.32038	-6.2081	-6.2884		-7.91517	-7.6118	-7.13889	-6.87377	-6.27229		10.4178	0	+		5	4	3	2	1
Glutaric acid-2TMS	-10.7329	-11.0674	-10.9363	-10.0078	-9.91249	-10.0764	-9.24689	-9.1646	-9.27413	-14.7464	-11.0534	-10.8021	-6.37814	-6.39271	-6.43716		-10.9122	-9.99889	-9.22854	-12.2006	-6.40267		3.43042	0.000112676	+		4	3	2	5	1
3-Aminopropanoic acid-3TMS	-7.28936	-7.15853	-7.15937	-7.9806	-7.97039	-7.92227	-7.14015	-7.18109	-7.20277	-7.02732	-7.08137	-6.92657	-8.27709	-8.49157	-8.41015		-7.20242	-7.95776	-7.17467	-7.01175	-8.39294		8.86961	0	+		3	4	2	1	5
Erythrulose-meto-3TMS(1)	-5.78616	-5.7313	-5.77997	-8.88511	-8.73739	-8.7957	-5.89135	-5.96727	-5.91752	-5.74464	-5.71852	-5.68028	-8.12988	-7.95845	-7.99201		-5.76581	-8.80607	-5.92538	-5.71448	-8.02678		13.5795	0	+		2	5	3	1	4
Decanoic acid-TMS	-8.22016	-7.86803	-8.38738	-8.26621	-7.66059	-8.07827	-8.03209	-8.14167	-8.10232	-8.26778	-7.92028	-8.18984	-7.96742	-8.25733	-7.62747		-8.15853	-8.00169	-8.09202	-8.12597	-7.95074		0.0856338	0.719121			5	2	3	4	1
Erythrulose-meto-3TMS(2)	-5.22594	-5.03025	-5.09244	-15.0944	-14.5805	-13.5393	-14.9217	-5.12324	-14.4741	-4.94334	-4.9869	-4.96301	-13.6438	-14.9603	-13.1675		-5.11621	-14.4047	-11.5064	-4.96441	-13.9239		2.80853	0.000582278	+		2	5	3	1	4
Citramalic acid-3TMS	-8.18966	-8.13866	-8.23179	-8.29647	-8.16592	-8.1863	-7.32926	-7.3012	-7.21885	-7.50558	-7.42768	-7.42525	-7.68829	-7.63807	-7.56732		-8.1867	-8.21623	-7.2831	-7.45283	-7.63123		8.40635	0	+		4	5	1	2	3
2-Propyl-5-hydroxy-pentanoic acid-2TMS	-14.5605	-15.5	-15.3899	-16.2036	-14.2331	-13.8392	-11.0581	-10.8257	-10.9914	-9.8541	-14.3069	-10.8502	-14.0262	-14.2591	-13.8924		-15.1501	-14.7587	-10.9584	-11.6704	-14.0592		2.28142	0.00204706	+		5	4	1	2	3
Threitol-4TMS	-8.4111	-8.24808	-8.06534	-7.14249	-7.13874	-7.19877	-8.10959	-8.0553	-7.90397	-8.26348	-8.38785	-8.46209	-5.02483	-4.97609	-5.03121		-8.24151	-7.16	-8.02295	-8.37114	-5.01071		10.9367	0	+		4	2	3	5	1
Dihydrouracil-TMS	-13.1854	-14.5933	-12.7652	-14.1461	-13.5656	-10.9357	-14.4046	-10.4634	-10.4939	-10.6738	-14.3397	-10.3211	-5.8033	-5.61036	-5.60545		-13.5146	-12.8825	-11.7873	-11.7782	-5.67304		2.8923	0.000516129	+		5	4	3	2	1
Malic acid-3TMS	-8.66986	-8.62669	-8.57053	-5.84162	-5.64504	-5.83607	-11.2081	-11.2011	-10.9914	-8.82197	-8.72644	-8.62155	-15.1205	-15.0666	-13.6858		-8.62236	-5.77424	-11.1335	-8.72332	-14.6243		9.10664	0	+		2	1	4	3	5
meso-Erythritol-4TMS	-10.271	-10.1041	-10.0896	-8.77038	-8.67807	-8.71783	-9.74364	-9.79506	-9.85117	-10.0981	-9.84388	-10.1164	-7.74882	-7.6321	-7.63032		-10.1549	-8.72209	-9.79662	-10.0195	-7.67042		10.2074	0	+		5	2	3	4	1
Dihydrouracil-2TMS	-14.9469	-12.5713	-15.2134	-13.2421	-13.5074	-15.5816	-15.5079	-11.3973	-10.8114	-15.5448	-11.2238	-12.7399	-7.27738	-7.12029	-6.69793		-14.2439	-14.1104	-12.5722	-13.1695	-7.03187		2.58317	0.00104348	+		5	4	2	3	1
Niacinamide-TMS	-6.98712	-6.85937	-6.79833	-11.5868	-11.2785	-11.2717	-15.4439	-11.5677	-12.012	-11.6691	-11.5574	-11.4597	-13.0571	-11.5086	-13.0168		-6.88161	-11.379	-13.0079	-11.5621	-12.5275		3.69977	0	+		1	2	5	3	4
Adipic acid-2TMS	-11.9073	-14.1778	-12.4737	-13.7334	-12.5973	-12.685	-14.7249	-13.9005	-11.8587	-15.1703	-13.3979	-12.8272	-15.4859	-15.2969	-14.5821		-12.853	-13.0052	-13.4947	-13.7985	-15.1216		0.827098	0.0587692			1	2	3	4	5
N-Acetylserine-2TMS	-10.7007	-10.5065	-10.6084	-9.84324	-9.71812	-9.89976	-9.67831	-9.73981	-9.76348	-9.629	-9.52256	-9.46109	-7.2714	-7.20352	-7.34305		-10.6052	-9.82037	-9.7272	-9.53755	-7.27266		11.5692	0	+		5	4	3	2	1
Aspartic acid-3TMS	-1.11471	-0.999231	-1.15154	-4.06527	-3.8407	-4.47541	-4.57346	-4.72563	-4.36191	-4.9764	-4.57945	-4.97539	-4.61679	-3.9736	-4.04541		-1.08849	-4.12713	-4.55366	-4.84375	-4.21193		7.47274	0	+		1	2	4	5	3
3-Aminoglutaric acid-2TMS	-0.960585	-0.829229	-0.997947	-3.93201	-3.67734	-4.34764	-4.40593	-4.55997	-4.21719	-4.7903	-4.39603	-4.83068	-4.44511	-3.82158	-3.90427		-0.929253	-3.98566	-4.39436	-4.67234	-4.05699		7.44246	0	+		1	2	4	5	3
4-Hydroxyproline-3TMS	-5.0858	-5.08488	-5.46804	-2.87027	-2.56071	-3.25063	-4.25967	-4.4994	-4.00362	-5.28212	-4.88669	-5.29552	-1.96166	-1.47587	-1.55321		-5.21291	-2.89387	-4.25423	-5.15478	-1.66358		7.30273	0	+		5	2	3	4	1
Methionine-2TMS	-5.18842	-5.21558	-5.37853	-6.11841	-6.044	-6.65376	-5.27173	-5.55451	-5.08513	-5.11666	-4.833	-5.17469	-6.78538	-6.13157	-6.20311		-5.26084	-6.27206	-5.30379	-5.04145	-6.37336		3.74878	0	+		2	4	3	1	5
4-Aminobutyric acid-3TMS	-4.27115	-4.02563	-4.01184	-4.54458	-4.66599	-4.65128	0.598255	0.563435	0.595434	-4.00061	-3.9987	-4.02264	-5.17491	-5.34702	-5.19212		-4.10287	-4.62062	0.585708	-4.00732	-5.23801		14.0427	0	+		3	4	1	2	5
5-Oxoproline-2TMS	-13.0443	-12.1671	-12.3783	-11.1846	-11.9213	-13.8827	-15.5454	-15.3364	-12.4527	-13.1548	-12.3832	-6.18899	0.412187	0.627206	0.560875		-12.5299	-12.3295	-14.4448	-10.5757	0.533423		4.62257	0	+		4	3	5	2	1
Cytosine-2TMS	-8.40202	-8.65302	-8.72738	-8.63812	-8.22082	-8.74965	-16.0271	-14.654	-15.3937	-14.9254	-9.17819	-9.32876	-14.1704	-13.8337	-13.2945		-8.59414	-8.5362	-15.3583	-11.1441	-13.7662		3.13277	0.00027027	+		2	1	5	3	4
Threonic acid-4TMS	-8.24369	-8.28507	-8.25872	-8.67145	-8.41583	-8.56878	-7.91008	-7.99704	-7.89261	-8.03192	-8.01257	-7.9322	-8.0837	-8.14263	-8.15455		-8.26249	-8.55202	-7.93324	-7.99223	-8.12696		5.26957	0	+		4	5	1	2	3
Oxalacetic acid-3TMS	-13.7934	-12.6817	-13.707	-13.3745	-13.4809	-13.5613	-12.8276	-14.9608	-12.8851	-12.1426	-13.5956	-11.5717	-11.2793	-12.208	-14.6851		-13.394	-13.4722	-13.5578	-12.4366	-12.7241		0.184827	0.498341			3	4	5	1	2
Cysteine-3TMS	-8.20739	-8.02214	-8.13683	-7.46842	-7.44867	-7.85738	-8.40964	-8.70274	-8.125	-8.24079	-7.81756	-8.21467	-8.36003	-7.73711	-7.59003		-8.12212	-7.59149	-8.41246	-8.09101	-7.89573		1.3872	0.0140594	+		4	1	5	3	2
5-Hydroxymethyl-2-furoic acid-2TMS	-11.2786	-11.0642	-10.9858	-12.026	-11.7214	-11.8055	-11.0902	-11.0334	-10.8277	-11.1182	-10.8958	-11.0411	-10.6505	-11.0689	-11.0157		-11.1095	-11.851	-10.9838	-11.0184	-10.9117		3.71853	0	+		4	5	2	3	1
Creatinine-3TMS	-9.34649	-9.31353	-9.70047	-9.22615	-9.28045	-9.50979	-9.6313	-9.91741	-9.29486	-9.58441	-9.2635	-9.51898	-10.0186	-9.64566	-9.12361		-9.4535	-9.3388	-9.61453	-9.45563	-9.59594		0.129714	0.615072			2	1	5	3	4
2-Hydroxyglutaric acid-3TMS	-7.04602	-6.98502	-7.05603	-6.44457	-6.2413	-6.36016	-4.60952	-4.66003	-4.59853	-6.28629	-6.27363	-6.272	-13.7328	-13.7432	-13.9295		-7.02902	-6.34867	-4.62269	-6.27731	-13.8018		16.6249	0	+		4	3	1	2	5
3-Hydroxyglutaric acid-3TMS	-0.312494	-0.314272	-0.314042	-0.327085	-0.317892	-0.331446	-0.3176	-0.324283	-0.332183	-0.341852	-0.346064	-0.332164	-0.325037	-0.326393	-0.321903		-0.313603	-0.325474	-0.324689	-0.340027	-0.324444		2.51081	0.0012439	+		1	4	3	5	2
O-Phosphoethanolamine-3TMS	-12.4433	-12.0681	-15.6358	-12.9713	-12.1359	-13.7034	-8.06184	-8.23787	-8.02528	-9.55634	-15.2298	-14.2377	-13.398	-14.6278	-9.94584		-13.3824	-12.9369	-8.10833	-13.0079	-12.6572		1.37775	0.0143842	+		5	3	1	4	2
2-Ketoglutaric acid-meto-2TMS	-14.382	-14.1406	-13.8936	-3.83822	-3.69036	-3.79388	-5.47277	-5.47432	-5.4481	-9.49047	-9.56808	-9.63587	-13.0364	-12.2324	-12.6772		-14.1387	-3.77415	-5.46506	-9.56481	-12.6487		12.7787	0	+		5	1	2	3	4
3-Phenyllactic acid-2TMS	-8.81185	-8.69802	-8.70664	-5.58911	-5.41903	-5.55539	-5.78555	-5.82151	-5.76851	-7.88153	-7.74228	-7.79163	-3.25526	-3.20823	-3.27403		-8.73884	-5.52118	-5.79186	-7.80515	-3.24584		15.0322	0	+		5	2	3	4	1
Phosphoenolpyruvic acid-3TMS	-15.7937	-12.3626	-13.3253	-14.6486	-11.4259	-12.9372	-10.1002	-12.3481	-9.82302	-10.77	-10.687	-10.7148	-9.39462	-9.31695	-9.47501		-13.8272	-13.0039	-10.7571	-10.7239	-9.39553		2.11538	0.00305618	+		5	4	3	2	1
3-Hydroxy-3-methylglutaric acid-3TMS	-14.6727	-12.7357	-13.4639	-10.5332	-10.6194	-10.583	-12.7115	-13.0827	-13.3321	-13.7997	-12.2828	-14.5342	-10.1232	-9.75421	-9.95732		-13.6241	-10.5785	-13.0421	-13.5389	-9.94492		3.9423	0	+		5	2	3	4	1
Phenylpyruvic acid-meto-TMS(2)	-14.3747	-16.3084	-14.1788	-8.178	-8.00713	-8.08173	-10.3917	-10.5497	-10.4206	-14.6361	-16.2756	-14.0757	-13.6707	-14.3251	-13.4552		-14.954	-8.08895	-10.454	-14.9958	-13.817		5.78602	0	+		4	1	2	5	3
Hypotaurine-3TMS	-9.003	-8.84485	-8.79853	-8.12217	-8.27393	-8.17295	-8.9814	-9.29563	-9.16361	-8.95767	-8.67463	-8.85897	-8.73942	-9.15595	-9.05768		-8.88213	-8.18968	-9.14688	-8.83042	-8.98435		3.85257	0	+		3	1	5	2	4
3-Aminoglutaric acid-3TMS	-12.1845	-15.4297	-13.0816	-12.326	-14.9019	-13.4354	-12.1979	-14.2587	-7.15985	-7.15724	-15.4429	-7.2583	-7.50218	-7.26007	-7.3796		-13.5653	-13.5544	-11.2055	-9.95281	-7.38062		0.971394	0.0388387	+		5	4	3	2	1
Ornithine-3TMS	-3.88637	-3.98336	-14.6657	-3.58108	-3.46366	-4.38618	-8.24206	-7.603	-14.5799	-4.36701	-3.37491	-4.53763	-10.6445	-8.18787	-8.09384		-7.51182	-3.81031	-10.1417	-4.09318	-8.97541		0.840761	0.0569273			3	1	5	2	4
Glutamic acid-13C5-3TMS	-10.2743	-10.212	-13.6355	-15.2024	-12.3261	-11.4646	-13.0721	-14.3436	-11.5921	-10.3198	-9.91132	-10.4004	-13.1703	-16.2711	-13.0599		-11.374	-12.9977	-13.0026	-10.2105	-14.1671		1.07074	0.0297302	+		2	3	4	1	5
Asparagine-4TMS	-14.4684	-15.1347	-14.8749	-9.98304	-9.86911	-10.3271	-14.5349	-10.3431	-12.2803	-15.4542	-13.5441	-14.7975	-12.7109	-14.1319	-13.8234		-14.826	-10.0597	-12.3861	-14.5986	-13.5554		2.68975	0.000675	+		5	1	2	4	3
Glutamic acid-3TMS	-0.187575	-0.0508977	-0.185831	-3.67668	-3.42656	-3.88674	-5.48527	-5.60297	-5.32559	-0.162142	0.131408	-0.160594	-6.08999	-5.81642	-5.6744		-0.141435	-3.66333	-5.47128	-0.0637759	-5.86027		11.6965	0	+		2	3	4	1	5
Triethanolamine-3TMS	-11.2274	-12.3562	-11.2144	-10.2443	-10.7068	-10.0944	-10.5993	-9.73361	-10.9381	-10.7347	-15.2708	-9.68109	-10.5576	-11.4216	-10.6445		-11.5993	-10.3485	-10.4237	-11.8955	-10.8746		0.22624	0.428123			4	1	2	5	3
Cadaverine-3TMS	-7.57837	-7.46393	-7.44	-3.49408	-8.13046	-7.68929	-5.37816	-4.98824	-4.87105	-4.35234	-4.52915	-4.55	-5.17298	-3.46382	-4.79663		-7.4941	-6.43794	-5.07915	-4.47716	-4.47781		1.32993	0.0163689	+		5	4	3	1	2
Tartaric acid-4TMS	-15.1457	-14.2467	-14.6086	-11.6047	-14.6398	-13.4842	-13.7111	-11.7601	-11.4562	-10.5672	-13.0289	-14.2701	-14.6132	-15.2425	-12.0524		-14.667	-13.2429	-12.3092	-12.6221	-13.9694		0.494369	0.139109			5	3	1	2	4
5-Aminovaleric acid-3TMS	-3.65339	-3.41945	-3.39665	-3.3509	-3.44904	-3.4108	-3.37321	-3.42656	-3.38321	-3.44401	-3.42892	-3.41149	-3.70688	-4.0765	-3.82351		-3.48983	-3.40358	-3.39433	-3.42814	-3.86896		2.81666	0.000585987	+		4	2	1	3	5
Lyxose-meto-4TMS(1)	-7.11886	-7.09414	-7.02177	-7.79464	-7.79798	-7.70549	-7.03971	-7.19724	-7.12901	-6.6199	-6.54567	-6.45628	-7.1926	-7.14232	-7.25642		-7.07826	-7.76604	-7.12199	-6.54062	-7.19711		7.88541	0	+		2	5	3	1	4
Xylose-meto-4TMS(1)	-9.44926	-9.43826	-9.43848	-9.62762	-13.1639	-9.63735	-9.29634	-9.46565	-7.73085	-7.59414	-8.69416	-7.58491	-7.12034	-9.65443	-9.86129		-9.442	-10.8096	-8.83095	-7.95773	-8.87869		0.818861	0.0596757			4	5	2	1	3
Phenylalanine-2TMS	0.438645	0.536058	0.436529	0.333202	0.492807	0.0990654	0.457755	0.306009	0.5696	0.399679	0.629295	0.409044	0.114163	0.302809	0.320075		0.470411	0.308358	0.444455	0.479339	0.245682		0.717176	0.0762241			2	4	3	1	5
Xylose-meto-4TMS(2)	-9.20494	-9.17265	-9.08941	-8.09006	-9.73146	-9.81976	-9.20442	-9.30021	-9.23416	-8.70951	-8.63686	-8.49482	-7.5262	-7.38232	-7.56806		-9.15567	-9.21376	-9.24626	-8.61373	-7.49219		2.53993	0.00120245	+		3	4	5	2	1
4-Hydroxybenzoic acid-2TMS	-8.53925	-8.77347	-8.85246	-7.99922	-7.8297	-7.95931	-8.85509	-8.93638	-9.02855	-7.86209	-7.95843	-7.77369	-7.71762	-7.64055	-7.67985		-8.72173	-7.92941	-8.94	-7.86473	-7.67934		7.11662	0	+		4	3	5	2	1
Lyxose-meto-4TMS(2)	-8.13057	-8.04273	-8.15348	-7.74758	-7.6387	-7.71913	-7.60695	-7.61356	-7.60665	-7.59847	-7.46776	-7.4767	-6.95615	-6.95539	-7.05837		-8.10893	-7.7018	-7.60905	-7.51431	-6.98997		8.25307	0	+		5	4	3	2	1
Arabinose-meto-4TMS	-8.24057	-8.09597	-8.04514	-7.60543	-7.53214	-7.78647	-7.56766	-7.51277	-7.45975	-7.53065	-7.54538	-7.41602	-7.04044	-6.98153	-6.97372		-8.12723	-7.64134	-7.51339	-7.49735	-6.99857		6.43706	0	+		5	4	3	2	1
4-Hydroxyphenylacetic acid-2TMS	-13.1211	-10.756	-10.2986	-10.2458	-10.0022	-10.2416	-11.0151	-10.6545	-10.8266	-10.6033	-10.532	-10.5038	-10.0173	-10.0482	-10.0108		-11.3919	-10.1632	-10.8321	-10.5464	-10.0254		0.736926	0.0729782			5	2	4	3	1
Xylulose-meto-4TMS	-7.28617	-7.2476	-7.38753	-4.34973	-4.1857	-4.29095	-5.08785	-5.1099	-5.01566	-5.67949	-5.66528	-5.68308	-8.88044	-8.75443	-8.81074		-7.3071	-4.27546	-5.07114	-5.67595	-8.8152		14.3746	0	+		4	1	2	3	5
Ribose-13C5-meto-4TMS	-14.6277	-14.3144	-14.9951	-10.8906	-10.4915	-10.4621	-11.6119	-11.4001	-11.2785	-15.5009	-15.8968	-15.5501	-14.0611	-13.4847	-16.2382		-14.6458	-10.6147	-11.4301	-15.6492	-14.5946		4.90432	0	+		4	1	2	5	3
Ribulose-meto-4TMS	-8.00895	-7.90624	-7.95929	-5.14499	-4.95819	-5.11197	-5.83321	-5.81046	-5.77439	-6.31604	-6.28869	-6.3352	-10.0073	-9.92031	-10.3403		-7.95816	-5.07172	-5.80602	-6.31331	-10.0893		12.1372	0	+		4	1	2	3	5
Lauric acid-TMS	-9.65012	-10.0066	-10.2445	-9.68574	-9.27421	-9.84841	-9.34111	-9.55608	-9.57528	-10.6192	-9.95159	-10.0552	-9.90867	-10.2288	-9.03114		-9.96707	-9.60279	-9.49082	-10.2087	-9.72288		0.677906	0.0849702			4	2	1	5	3
Ribose-meto-4TMS	-9.03015	-8.90178	-8.86296	-4.9746	-4.81105	-4.94788	-5.68458	-5.74167	-5.61612	-8.03809	-7.95462	-8.01531	-7.9264	-7.84459	-7.7508		-8.93163	-4.91118	-5.68079	-8.00267	-7.8406		13.1102	0	+		5	1	2	4	3
2-Ketoadipic acid-meto-2TMS(2)	-13.9514	-14.5259	-12.5693	-11.5421	-11.5987	-11.4706	-10.4891	-10.3672	-10.8576	-13.7229	-16.7266	-14.2688	-11.2368	-11.4101	-11.4523		-13.6822	-11.5371	-10.5713	-14.9061	-11.3664		3.30346	0.000137931	+		4	3	1	5	2
N-Acetylaspartic acid-3TMS	-11.714	-12.929	-14.0245	-10.6787	-10.6338	-14.9165	-10.7814	-13.8425	-10.475	-11.725	-10.884	-12.2454	-14.547	-14.9513	-12.3835		-12.8891	-12.0763	-11.6996	-11.6181	-13.9606		0.387603	0.198968			4	3	2	1	5
Homocysteine-3TMS	-9.1144	-9.07215	-9.05123	-8.88065	-8.78205	-9.20726	-5.69167	-5.95821	-5.40583	-7.64132	-7.28719	-7.63466	-7.93752	-7.76945	-7.6586		-9.07926	-8.95666	-5.68523	-7.52106	-7.78852		8.15987	0	+		5	4	1	2	3
Asparagine-3TMS	-6.20794	-6.02044	-6.02539	-8.62802	-8.37825	-8.60089	-11.3	-11.301	-12.8996	-10.8628	-9.86982	-10.1181	-13.7586	-12.5152	-12.1085		-6.08459	-8.53572	-11.8335	-10.2836	-12.7941		6.11822	0	+		1	2	4	3	5
Taurine-13C2-3TMS	-13.4122	-9.96514	-10.1935	-13.6039	-13.1123	-13.7155	-9.99368	-13.7526	-10.5204	-13.7115	-9.57628	-10.0311	-14.4162	-13.3209	-13.339		-11.1903	-13.4772	-11.4222	-11.1063	-13.692		0.709666	0.0776309			2	4	3	1	5
Taurine-3TMS	-14.1956	-9.20927	-7.48934	-9.93847	-13.9516	-15.146	-7.40339	-7.85359	-13.3767	-7.58695	-13.498	-7.69435	-14.8628	-13.511	-15.9146		-10.2981	-13.012	-9.54457	-9.59311	-14.7628		0.719791	0.0760519			3	4	1	2	5
3-Sulfinoalanine-3TMS	-12.2935	-12.4322	-15.4205	-13.965	-11.7708	-12.0691	-13.4032	-11.601	-16.0598	-12.7764	-11.7989	-12.7296	-11.5929	-11.0274	-12.2614		-13.3821	-12.6016	-13.688	-12.4349	-11.6272		0.333544	0.255451			4	3	5	2	1
Ribonolactone-3TMS	-11.4254	-11.2432	-11.1963	-8.88278	-8.82131	-8.8466	-11.2675	-11.079	-10.7674	-10.9217	-10.8504	-10.8843	-12.4342	-11.4305	-12.6751		-11.2883	-8.85023	-11.038	-10.8855	-12.1799		5.56828	0	+		4	1	3	2	5
Xylitol-5TMS	-9.56743	-9.59536	-9.68325	-7.59532	-7.59905	-7.66051	-9.67661	-9.60556	-9.73802	-9.52415	-9.63373	-9.70171	-10.3368	-10.7168	-10.6075		-9.61535	-7.61829	-9.6734	-9.61986	-10.5537		9.74181	0	+		2	1	4	3	5
Arabitol-5TMS	-8.60311	-9.1871	-9.1636	-3.1142	-3.03307	-3.14103	-3.12731	-3.13307	-3.06407	-7.75701	-7.52714	-8.07729	-4.42008	-4.32878	-4.43695		-8.9846	-3.0961	-3.10815	-7.78715	-4.39527		11.0702	0	+		5	1	2	4	3
Lysine-3TMS	-12.644	-12.1759	-11.214	-11.3494	-11.4928	-11.5014	-13.4089	-13.0529	-13.4957	-12.8397	-13.437	-14.1546	-12.5598	-12.815	-12.592		-12.0113	-11.4479	-13.3192	-13.4771	-12.6556		2.89572	0.000519481	+		2	1	4	5	3
Ribitol-5TMS	-9.641	-9.67885	-9.61036	-1.78362	-1.66822	-1.76419	-5.47612	-5.46677	-5.37511	-9.50874	-9.40229	-9.71492	-3.20736	-3.11706	-3.1521		-9.6434	-1.73867	-5.43933	-9.54198	-3.15884		15.9489	0	+		5	1	3	4	2
Suberic acid-2TMS	-12.9975	-13.9289	-13.4338	-13.5684	-13.9067	-12.295	-13.7889	-13.866	-12.7446	-12.6251	-14.2078	-14.4705	-16.0803	-12.8587	-14.0844		-13.4534	-13.2567	-13.4665	-13.7678	-14.3412		0.149324	0.57493			2	1	3	4	5
1,6-Anhydroglucose-3TMS	-8.34496	-8.16649	-8.28559	-2.38849	-2.26617	-2.37785	-5.75748	-5.7328	-5.7226	-8.86797	-8.83666	-8.81159	-3.75906	-3.67721	-3.72754		-8.26568	-2.34417	-5.73763	-8.83874	-3.72127		16.6241	0	+		4	1	3	5	2
Glycerol 2-phosphate-4TMS	-9.32349	-9.4812	-9.38524	-9.2883	-9.36455	-9.25088	-9.71346	-9.90924	-9.78396	-9.3549	-9.48214	-9.34254	-9.79113	-9.38917	-9.8091		-9.39664	-9.30124	-9.80222	-9.39319	-9.66313		2.47249	0.0014303	+		3	1	5	2	4
2-Aminoadipic acid-3TMS	-13.8806	-15.5579	-14.0531	-13.683	-12.3071	-13.866	-14.3684	-13.7953	-14.7082	-11.9823	-13.8127	-11.7465	-14.1818	-13.7288	-14.0075		-14.4972	-13.2854	-14.2906	-12.5138	-13.9727		1.19823	0.0224381	+		5	2	4	1	3
2-Deoxy-glucose-4TMS(1)	-8.52088	-8.13479	-16.7481	-2.40861	-2.31385	-2.36314	-5.82416	-5.76017	-5.80022	-8.15035	-8.06927	-8.21682	-3.79358	-3.64906	-3.66824		-11.1346	-2.36187	-5.79485	-8.14548	-3.70363		2.39422	0.00166265	+		5	1	3	4	2
Putrescine-4TMS	-4.6686	-4.58702	-4.6885	-5.04127	-5.13829	-5.10603	-6.96465	-6.63694	-6.94339	-2.04111	-1.98615	-2.02793	-12.5568	-9.63122	-10.4134		-4.64804	-5.0952	-6.84833	-2.01839	-10.8671		6.51208	0	+		2	3	4	1	5
Dihydroxyacetone phosphate-meto-3TMS(1)	-7.45787	-7.29132	-7.23709	-11.3536	-8.87393	-11.7173	-7.87821	-7.97686	-7.76642	-8.70831	-8.61525	-8.61251	-9.84447	-9.79883	-9.77558		-7.32876	-10.6483	-7.87383	-8.64536	-9.8063		3.03893	0.000373333	+		1	5	2	3	4
Ribonic acid-5TMS	-8.41523	-8.28316	-8.33032	-7.89636	-7.74732	-7.81701	-7.90606	-8.5307	-7.93844	-8.56516	-8.39893	-8.55712	-7.59573	-7.49139	-7.54569		-8.3429	-7.82023	-8.12507	-8.50707	-7.54427		3.58328	0	+		4	2	3	5	1
Quinolinic acid-2TMS	-13.3386	-13.6556	-14.0303	-11.6428	-11.5465	-11.47	-14.131	-13.2539	-14.0688	-12.8603	-14.5612	-14.245	-10.8683	-10.6886	-10.9784		-13.6748	-11.5531	-13.8179	-13.8888	-10.8451		4.53647	0	+		3	2	4	5	1
Aconitic acid-3TMS	-11.5751	-11.4138	-11.4629	-6.27384	-6.1038	-6.24094	-13.0716	-11.2092	-11.1657	-10.535	-10.4927	-10.393	-11.6712	-11.7285	-12.1547		-11.4839	-6.20619	-11.8155	-10.4736	-11.8515		6.46554	0	+		3	1	4	2	5
Glycerol 3-phosphate-4TMS	-5.89439	-5.77157	-5.78969	-7.35545	-7.4208	-7.40231	-6.37072	-6.45935	-6.35112	-7.36676	-7.38179	-7.25455	-8.07759	-7.93609	-8.25321		-5.81855	-7.39285	-6.39373	-7.33436	-8.08896		9.70733	0	+		1	4	2	3	5
Dihydroxyacetone phosphate-meto-3TMS(2)	-7.34252	-7.25494	-7.20516	-8.84295	-8.72942	-8.75517	-7.73405	-7.80361	-7.70262	-8.42813	-8.51709	-8.45106	-9.65811	-9.58245	-9.71277		-7.26754	-8.77585	-7.74676	-8.46542	-9.65111		11.569	0	+		1	4	2	3	5
5-Aminolevulinic acid-meto-3TMS(1)	-13.7111	-11.8308	-13.6972	-9.47002	-9.27012	-9.53285	-11.268	-11.0149	-11.147	-14.3447	-14.4725	-14.969	-9.35551	-9.45175	-9.23271		-13.0797	-9.42433	-11.1433	-14.5954	-9.34666		6.22039	0	+		4	2	3	5	1
Glutamine-3TMS	-9.41727	-9.74511	-10.0176	-7.5373	-7.59847	-7.8106	-9.38509	-13.7885	-14.0554	-16.3408	-10.0394	-13.4144	-14.91	-14.5081	-14.0857		-9.72667	-7.64879	-12.4097	-13.2648	-14.5013		2.18044	0.00262069	+		2	1	3	4	5
2-Deoxy-glucose-meto-4TMS	-14.1587	-13.0083	-14.4332	-14.8958	-15.1985	-14.9105	-11.5113	-11.302	-11.645	-11.2986	-11.2845	-10.6769	-14.2915	-12.7775	-15.005		-13.8667	-15.0016	-11.4861	-11.0867	-14.0246		4.16633	0	+		3	5	2	1	4
O-Phosphoethanolamine-4TMS	-12.2046	-12.2839	-11.9594	-11.674	-11.5595	-11.2722	-12.1661	-13.0279	-13.2701	-11.8692	-15.8229	-11.7715	-14.2315	-12.4935	-13.8252		-12.1493	-11.5019	-12.8214	-13.1545	-13.5168		0.554923	0.116361			2	1	3	4	5
2-Deoxy-glucose-4TMS(2)	-8.47758	-7.33217	-7.22962	-7.04951	-7.0227	-7.1344	-6.9553	-7.00394	-6.93144	-7.06476	-6.89606	-6.92294	-8.09765	-7.28641	-7.42672		-7.67979	-7.06887	-6.96356	-6.96125	-7.60359		1.06919	0.0297037	+		5	3	2	1	4
3-Phosphoglyceric acid-4TMS	-12.0518	-11.8027	-13.2359	-12.3989	-12.2338	-12.4706	-10.0106	-10.2137	-9.90722	-10.5932	-10.4672	-14.1222	-10.0386	-9.72367	-10.0995		-12.3634	-12.3678	-10.0439	-11.7276	-9.95393		1.58485	0.00903093	+		4	5	2	3	1
Azelaic acid-2TMS	-11.9575	-13.0627	-10.9777	-15.0422	-12.5161	-12.8707	-14.7724	-13.9433	-15.6564	-12.5739	-12.661	-12.8565	-13.9213	-12.4425	-12.2264		-11.9993	-13.4763	-14.7907	-12.6971	-12.8634		1.34722	0.0156878	+		1	4	5	2	3
Citric acid-d4-4TMS	-6.08782	-6.00089	-6.01705	-6.21045	-6.0115	-6.18479	-13.9662	-14.4005	-12.7502	-14.3877	-15.1364	-11.9718	-14.0208	-13.384	-14.9747		-6.03525	-6.13558	-13.7056	-13.832	-14.1265		6.44145	0	+		1	2	3	4	5
Ornithine-d7-4TMS	-10.4094	-13.2515	-14.6891	-11.8514	-11.1054	-13.93	-16.4909	-11.87	-15.0475	-13.9225	-8.81999	-14.7462	-12.1123	-14.332	-9.28964		-12.7833	-12.2956	-14.4694	-12.4962	-11.9113		0.134414	0.605716			4	2	5	3	1
Glycyl-Glycine-4TMS	-7.3877	-13.3129	-7.32852	-14.2491	-13.6479	-13.7058	-13.7476	-8.27085	-7.92372	-7.73806	-13.8527	-7.68125	-11.1761	-10.2073	-10.0522		-9.34304	-13.8676	-9.98073	-9.75734	-10.4785		0.521778	0.127805			1	5	3	2	4
Isocitric acid-4TMS	-13.6801	-14.3257	-16.7239	-4.21128	-3.96576	-4.11308	-14.5022	-13.1405	-12.0709	-12.7393	-11.4561	-12.8106	-11.1432	-8.40616	-8.49587		-14.9099	-4.09671	-13.2378	-12.3354	-9.3484		5.30852	0	+		5	1	4	3	2
2-Aminopimelic acid-3TMS	-0.956935	-0.831868	-0.854058	-1.0714	-0.865207	-1.02924	-10.906	-14.4018	-11.9241	-10.4701	-10.482	-10.7218	-13.7787	-11.5445	-12.7021		-0.880954	-0.988615	-12.4106	-10.558	-12.6751		7.70779	0	+		1	2	4	3	5
Citric acid-4TMS	-0.237437	-0.109416	-0.124679	-0.327422	-0.133999	-0.263941	-13.1878	-14.4647	-13.5831	-13.893	-13.2518	-12.3172	-14.3706	-13.5654	-13.0284		-0.157177	-0.241788	-13.7452	-13.154	-13.6548		10.8387	0	+		1	2	5	3	4
Ornithine-4TMS	-12.3187	-13.8379	-15.9619	-14.1588	-14.8809	-16.0383	-12.6295	-14.0936	-15.5827	-12.191	-16.7311	-16.0573	-12.9059	-12.8723	-13.9946		-14.0395	-15.026	-14.1019	-14.9931	-13.2576		0.190867	0.488746			2	5	3	4	1
Arginine-3TMS	-5.15618	-5.16318	-5.31992	-5.0302	-4.87752	-5.1534	-9.41626	-9.77034	-9.28792	-5.53892	-5.10431	-5.47578	-9.56499	-9.41791	-8.93213		-5.21309	-5.02037	-9.49151	-5.373	-9.30501		9.72296	0	+		2	1	5	3	4
Histidinol-2TMS	-12.0899	-12.835	-16.2526	-14.2938	-11.8187	-12.9017	-13.7574	-12.0865	-12.9752	-13.5227	-12.5839	-14.06	-15.5608	-13.2154	-12.6486		-13.7258	-13.0047	-12.9397	-13.3889	-13.8083		0.0403076	0.858849			4	2	1	3	5
Tagatose-meto-5TMS(1)	-10.2424	-4.42582	-10.1938	-10.7869	-10.3924	-8.84138	-10.1107	-9.76735	-9.84079	-9.82448	-9.81597	-9.83044	-5.77531	-9.38568	-9.60832		-8.28734	-10.0069	-9.90627	-9.82363	-8.25643		0.223723	0.431023			2	5	4	3	1
O-Phospho-Serine-4TMS	-14.5845	-15.5974	-12.0317	-12.5409	-11.563	-12.7278	-12.9267	-13.668	-15.6695	-13.9251	-12.2544	-12.5049	-15.3956	-15.7225	-12.3557		-14.0712	-12.2772	-14.0881	-12.8948	-14.4913		0.478578	0.145622			3	1	4	2	5
Dopamine-3TMS	-8.11335	-8.24469	-8.13601	-8.33325	-8.52387	-12.1123	-10.0428	-10.3835	-6.83829	-8.78185	-3.60289	-8.46183	-10.5601	-3.75727	-11.8089		-8.16468	-9.65648	-9.0882	-6.94885	-8.70876		0.112304	0.656029			2	5	4	1	3
Hypoxanthine-2TMS	-4.62196	-4.4261	-4.39825	-8.50575	-8.36305	-8.58202	-9.50423	-9.39191	-9.60182	-6.05551	-5.93551	-5.98588	-11.3994	-11.3135	-11.307		-4.48211	-8.4836	-9.49932	-5.9923	-11.3399		14.2489	0	+		1	3	4	2	5
Glycyl-Glycine-3TMS	-3.64417	-3.57969	-5.9805	-4.86872	-6.33565	-5.93822	-9.12434	-13.1175	-8.94475	-1.47398	-4.23991	-1.39392	-5.88379	-6.4307	-6.96138		-4.40145	-5.7142	-10.3955	-2.36927	-6.42529		3.11897	0.000295302	+		2	3	5	1	4
Psicose-meto-5TMS(1)	-4.54782	-4.44941	-4.4349	-8.8098	-8.7211	-8.80131	-4.5592	-4.57318	-4.58679	-4.47825	-4.44599	-4.39439	-5.81872	-5.70907	-5.74258		-4.47738	-8.7774	-4.57305	-4.43954	-5.75679		15.5336	0	+		2	5	3	1	4
Cadaverine-4TMS	-3.86798	-4.05786	-4.04997	-5.1041	-5.08295	-5.14909	-8.60602	-9.99812	-6.83747	-15.0292	-13.0341	-15.5692	-6.1383	-11.2965	-7.24585		-3.99194	-5.11204	-8.48054	-14.5442	-8.22689		4.1877	0	+		1	2	4	5	3
Psicose-meto-5TMS(2)	0.621782	0.69811	0.67879	-7.78049	-7.82275	-8.04648	-5.16112	-5.14156	-4.96774	0.126948	0.160353	0.166336	-4.91041	-4.8547	-4.95128		0.666227	-7.88324	-5.09014	0.151213	-4.90546		15.9902	0	+		1	5	4	2	3
Tagatose-meto-5TMS(2)	0.649415	0.716809	0.703018	-7.75142	-7.57611	-7.99568	-5.00087	-5.0237	-5.07605	0.159903	0.215528	0.201024	-9.12486	-8.99015	-8.93066		0.689747	-7.7744	-5.03354	0.192152	-9.01522		15.802	0	+		1	4	3	2	5
Methionine sulfone-2TMS	-13.9946	-15.3196	-12.9225	-10.3813	-10.2009	-10.3263	-10.5231	-10.5831	-10.6989	-14.484	-13.9877	-13.4709	-14.7105	-12.0383	-11.5584		-14.0789	-10.3028	-10.6017	-13.9809	-12.7691		2.90288	0.000522876	+		5	1	2	4	3
Sorbose-meto-5TMS(1)	0.596936	0.667854	0.651457	-7.79473	-7.82094	-7.763	-5.00167	-5.15954	-5.05067	0.0696377	0.124182	0.114827	-9.04766	-8.81618	-9.27666		0.638749	-7.79289	-5.07063	0.102882	-9.04683		15.6107	0	+		1	4	3	2	5
Fructose-meto-5TMS(1)	0.695397	0.760842	0.732707	-7.77464	-7.58354	-7.60523	-4.87883	-5.00343	-4.8969	0.27411	0.335359	0.317659	-9.48199	-9.54415	-9.37692		0.729649	-7.65447	-4.92639	0.309043	-9.46769		17.7825	0	+		1	4	3	2	5
Pyridoxal-meto-2TMS(1)	-13.7771	-13.047	-12.8989	-12.1703	-14.0419	-14.1945	-10.1882	-9.84916	-14.5129	-13.6137	-15.4516	-13.867	-13.5209	-13.4899	-13.826		-13.241	-13.4689	-11.5167	-14.3108	-13.6123		0.662709	0.0876962			2	3	1	5	4
Sorbose-meto-5TMS(2)	0.174347	0.276321	0.26353	-10.5903	-10.4386	-10.3685	-5.81048	-5.86735	-5.85961	-0.658912	-0.597881	-0.610021	-9.04766	-8.81618	-9.27666		0.238066	-10.4658	-5.84581	-0.622271	-9.04683		15.7021	0	+		1	5	3	2	4
4-Aminobenzoic acid-2TMS	-9.77552	-9.44278	-9.58014	-6.9744	-6.74597	-6.93528	-8.96571	-9.14047	-9.26653	-9.70328	-9.57518	-9.44986	-7.30979	-7.14347	-7.2739		-9.59948	-6.88522	-9.12424	-9.57611	-7.24239		9.57501	0	+		5	1	3	4	2
Galactosamine-5TMS(1)	-10.2117	-14.3666	-15.6382	-11.6187	-11.1094	-11.1426	-12.9039	-13.5807	-14.5582	-14.8076	-12.1641	-9.07119	-12.7038	-12.0696	-9.37279		-13.4055	-11.2902	-13.6809	-12.0143	-11.3821		0.318593	0.273922			4	1	5	3	2
Allose-meto-5TMS(1)	-2.08087	-1.98039	-2.00038	-7.72184	-7.61871	-7.72966	-8.15425	-7.9499	-7.94041	-1.9851	-1.95998	-1.96958	-9.41587	-9.36589	-11.5832		-2.02055	-7.69007	-8.01485	-1.97155	-10.1217		7.83716	0	+		2	3	4	1	5
Myristic acid-TMS	-14.6519	-13.1358	-14.6128	-9.70547	-9.2779	-15.2098	-13.6732	-13.5247	-9.81782	-12.053	-14.0543	-11.9673	-9.49128	-9.70015	-9.4213		-14.1335	-11.3977	-12.3386	-12.6915	-9.53758		0.933608	0.0431598	+		5	2	3	4	1
Fructose-meto-5TMS(2)	0.230917	0.341542	0.314469	-10.4098	-10.345	-10.3	-5.81341	-5.82034	-5.89952	-0.563531	-0.49578	-0.514701	-9.8019	-9.74502	-12.1965		0.295643	-10.3516	-5.84442	-0.524671	-10.5811		8.82565	0	+		1	4	3	2	5
Mannose-meto-5TMS(1)	-1.53081	-1.41949	-1.42367	-9.63445	-9.95133	-9.74823	-1.77817	-1.78577	-1.72613	-1.44168	-1.39191	-1.39663	-10.7295	-10.6032	-10.9836		-1.45799	-9.778	-1.76336	-1.41008	-10.7721		15.7262	0	+		2	4	3	1	5
Galactose-meto-5TMS(1)	1.80115	1.86068	1.82083	-4.89879	-4.95723	-4.777	1.57712	1.52416	1.5717	1.73252	1.8444	1.7217	-6.08199	-5.86867	-5.87881		1.82755	-4.87767	1.55766	1.76621	-5.94315		16.7141	0	+		1	4	3	2	5
3-Hydroxyanthranilic acid-3TMS	-13.7046	-10.6126	-14.9372	-11.1841	-13.2038	-14.0261	-11.3754	-11.0095	-11.1549	-11.0251	-14.4345	-10.9285	-10.5032	-9.83805	-9.95561		-13.0848	-12.8047	-11.18	-12.1294	-10.099		0.772031	0.0680356			5	4	2	3	1
Vanilmandelic acid-3TMS	-11.8158	-9.04362	-10.9554	-11.2692	-14.6081	-10.1847	-11.5262	-11.247	-10.5561	-14.3572	-11.5259	-13.9848	-10.0441	-14.0575	-9.72508		-10.6049	-12.0207	-11.1098	-13.2893	-11.2756		0.36006	0.223605			1	4	2	5	3
Glucono-1,5-lactone-4TMS	-5.18187	-5.09079	-5.06357	-13.2043	-14.1505	-14.5138	-13.9243	-11.9003	-13.5463	-15.3575	-14.4761	-15.8091	-15.5526	-13.552	-14.8186		-5.11207	-13.9562	-13.1236	-15.2142	-14.641		6.91263	0	+		1	3	2	5	4
Glucose-meto-5TMS(1)	-1.43283	-1.32688	-1.32395	-4.98961	-5.01124	-4.85206	-1.67002	-7.2976	-1.62181	-1.34204	-1.29121	-1.29063	-6.12507	-5.92088	-6.03265		-1.36122	-4.95097	-3.52981	-1.30796	-6.0262		2.06538	0.00333702	+		2	4	3	1	5
Hippuric acid-TMS	-13.992	-14.4259	-14.5926	-8.54314	-8.38977	-8.75767	-12.0815	-13.0479	-14.2974	-13.5147	-14.8891	-14.3282	-7.90351	-14.011	-13.2555		-14.3368	-8.56353	-13.1423	-14.244	-11.7233		2.14843	0.00290286	+		5	1	3	4	2
Mannose-meto-5TMS(2)	1.79086	1.83835	1.81419	-8.88657	-8.87779	-8.86516	-7.54767	-7.3317	1.54374	1.72156	1.83549	1.7182	-6.14618	-6.12129	-6.0461		1.81447	-8.87651	-4.44521	1.75842	-6.10452		3.2201	0.000191781	+		1	5	3	2	4
Allose-meto-5TMS(2)	-1.41823	-1.3155	-1.31147	-9.07842	-8.85508	-8.97829	-1.67002	-7.2976	-1.62181	-1.33851	-1.28695	-1.28656	-6.12507	-9.55065	-9.41821		-1.3484	-8.9706	-3.52981	-1.30401	-8.36464		3.44127	8.63e-05	+		2	5	3	1	4
Erythrose 4-phosphate-meto-4TMS(1)	-12.8608	-10.5469	-10.698	-14.1985	-11.8777	-11.8361	-11.893	-11.5135	-10.5849	-11.2304	-11.0281	-13.8945	-15.5047	-14.5709	-14.3043		-11.3686	-12.6374	-11.3305	-12.051	-14.7933		1.58183	0.00902564	+		2	4	1	3	5
Pyridoxal-meto-2TMS(2)	-13.8488	-15.4301	-14.3964	-13.4935	-14.4916	-13.8525	-11.8753	-14.1187	-13.2897	-13.7152	-13.7294	-13.1127	-12.9068	-15.7511	-14.7299		-14.5584	-13.9459	-13.0946	-13.5191	-14.4626		0.484938	0.143065			5	3	1	2	4
Histamine-3TMS	-15.3471	-13.4098	-15.21	-9.61228	-9.68032	-9.48694	-8.28231	-8.31608	-8.23843	-13.3551	-14.5336	-14.3791	-13.582	-8.98524	-9.32709		-14.6556	-9.59318	-8.27894	-14.0893	-10.6314		3.43584	0.000113475	+		5	2	1	4	3
N6-Acetyllysine-3TMS	-12.1893	-14.6687	-11.9435	-13.798	-13.8076	-14.0887	-11.3391	-14.5257	-11.1442	-11.6189	-14.7632	-14.3869	-12.5242	-14.7712	-13.3977		-12.9338	-13.8981	-12.3363	-13.5897	-13.5644		0.164952	0.541756			2	5	1	4	3
Galactose-meto-5TMS(2)	1.30262	1.36152	1.33414	-7.60009	-7.64025	-7.47741	1.02111	0.953955	1.04031	1.21118	1.32238	1.20488	-8.7878	-8.5855	-8.67102		1.33276	-7.57258	1.00512	1.24615	-8.68144		18.2351	0	+		1	4	3	2	5
Adenine-2TMS	-5.47525	-5.36104	-5.36976	-6.314	-6.11905	-6.28423	-7.54914	-7.49617	-7.48663	-6.32085	-6.13507	-6.17157	-9.90747	-9.31457	-9.57746		-5.40201	-6.23909	-7.51065	-6.20916	-9.59984		9.99534	0	+		1	3	4	2	5
N-Acetyl-Lysine-2TMS	-13.6189	-14.612	-13.4457	-10.1106	-9.76944	-14.816	-15.459	-14.3496	-13.2122	-14.7602	-14.9719	-15.3251	-10.7503	-13.6805	-10.7233		-13.8922	-11.5653	-14.3403	-15.0191	-11.718		1.12348	0.0262911	+		3	1	4	5	2
Glucose-meto-5TMS(2)	-6.46776	-6.25902	-4.82317	-7.44507	-7.43018	-7.3908	-5.88313	-5.91101	-5.82401	-5.16287	-5.14938	-5.16602	-8.76082	-8.55811	-8.6691		-5.84998	-7.42202	-5.87271	-5.15942	-8.66268		5.25302	0	+		2	4	3	1	5
4-Hydroxyphenyllactic acid-3TMS	-15.6971	-10.6897	-15.2799	-6.5519	-12.9291	-6.5634	-6.19309	-13.8529	-6.13825	-8.96186	-13.0869	-8.94519	-3.82061	-3.74316	-3.85491		-13.8889	-8.68145	-8.72808	-10.3313	-3.80623		1.53705	0.00990955	+		5	2	3	4	1
Pyridoxine-3TMS	-8.36347	-13.7831	-8.13653	-12.4382	-12.2314	-15.8393	-9.91232	-9.97518	-10.0755	-10.1559	-10.0554	-9.91079	-10.3089	-9.88163	-9.90882		-10.0944	-13.503	-9.98767	-10.0407	-10.0331		0.961501	0.0398899	+		4	5	1	3	2
Glucosamine-5TMS(1)	-3.70952	-3.66787	-3.69423	-7.81367	-11.2255	-7.78001	-5.58337	-5.61518	-5.51976	-4.44984	-11.4567	-14.9914	-12.9457	-13.5442	-13.2739		-3.69054	-8.93974	-5.57277	-10.2993	-13.2546		2.13778	0.00290909	+		1	3	2	4	5
Mannitol-6TMS	1.30384	1.35647	1.33043	-9.1745	-9.00854	-9.251	1.03988	0.98937	1.04219	1.20269	1.31984	1.20173	-8.44214	-8.07475	-8.42883		1.33025	-9.14468	1.02381	1.24142	-8.31524		16.4112	0	+		1	5	3	2	4
N-Acetylglutamine-3TMS	-3.05185	-2.92863	-2.94449	-13.188	-11.9137	-12.0585	-4.67084	-4.67523	-4.70977	-3.58665	-3.49532	-11.9589	-13.5493	-12.9684	-14.2061		-2.97499	-12.3867	-4.68528	-6.34694	-13.5746		3.33538	0.000138889	+		1	4	2	3	5
Sorbitol-6TMS	-6.48775	-6.34331	-6.4447	-6.42582	-6.27818	-6.38882	-5.91844	-5.94066	-5.85759	-5.52239	-5.69401	-5.66443	-8.32827	-8.87207	-8.02828		-6.42525	-6.36427	-5.90556	-5.62694	-8.40954		7.01391	0	+		4	3	2	1	5
Galactitol-6TMS	-4.34556	-4.23241	-4.27403	-4.29208	-4.14366	-4.29396	-8.89765	-8.42033	-8.58061	-8.41292	-8.23612	-8.54093	-8.45704	-8.02399	-8.22955		-4.284	-4.24323	-8.63286	-8.39666	-8.23686		10.9756	0	+		2	1	5	4	3
Lysine-4TMS	-0.436538	-0.327801	-0.400129	-0.504588	-0.386131	-0.51085	-7.19194	-7.42328	-7.24872	-7.20731	-6.9752	-7.07737	-6.31643	-6.00284	-5.95283		-0.388156	-0.46719	-7.28798	-7.08662	-6.0907		14.2221	0	+		1	2	5	4	3
4-Hydroxyphenylpyruvic acid-meto-2TMS	-12.826	-14.1124	-15.4908	-9.20505	-13.8005	-9.19632	-9.64415	-14.8617	-9.83815	-9.77706	-9.77056	-9.98312	-14.3707	-14.5064	-13.6676		-14.1431	-10.734	-11.448	-9.84358	-14.1815		1.25827	0.0192153	+		4	2	3	1	5
Tyramine-3TMS	-2.00221	-1.85201	-1.84392	-2.46601	-2.34637	-2.34938	-3.15712	-3.17167	-3.14243	-2.12346	-2.12319	-2.05636	-4.61858	-4.43825	-4.56259		-1.89938	-2.38725	-3.15707	-2.101	-4.53981		11.6429	0	+		1	3	4	2	5
Galacturonic acid-meto-5TMS(1)	-9.06942	-8.98243	-8.63266	-9.68506	-8.58591	-9.11575	-8.7432	-8.62169	-9.05942	-8.8975	-8.58509	-8.9222	-8.80694	-8.19994	-8.96267		-8.89484	-9.12891	-8.8081	-8.8016	-8.65652		0.236863	0.411614			4	5	3	2	1
Histidine-3TMS	-3.36115	-2.77724	-2.77727	-4.24758	-4.05681	-4.23242	-3.62881	-3.72824	-3.54174	-3.03178	-2.69852	-3.01923	-6.37927	-5.82476	-5.72012		-2.97189	-4.17894	-3.63293	-2.91651	-5.97472		6.82149	0	+		2	4	3	1	5
Glucosamine-5TMS(2)	-9.66105	-10.0698	-9.90567	-12.9634	-10.3364	-12.4778	-10.9821	-11.1072	-10.0067	-11.209	-10.965	-11.6381	-12.3665	-12.2565	-12.3619		-9.87883	-11.9258	-10.6987	-11.2707	-12.3283		1.94018	0.00434973	+		1	4	2	3	5
Glucuronic acid-meto-5TMS(2)	-14.1145	-11.8812	-12.8747	-13.0192	-14.2638	-13.3875	-12.9926	-12.2707	-13.8442	-13.8325	-14.4002	-14.8313	-16.4529	-14.4821	-10.3034		-12.9568	-13.5568	-13.0358	-14.3547	-13.7461		0.0921049	0.704829			1	3	2	5	4
Ureidosuccinic acid-3TMS	-15.5146	-14.1507	-15.0031	-9.88647	-10.1527	-10.2627	-7.80082	-7.84455	-7.87146	-8.81214	-8.98417	-8.86065	-9.54831	-9.58398	-9.67365		-14.8895	-10.1006	-7.83894	-8.88565	-9.60198		8.88886	0	+		5	4	1	2	3
Galactosamine-5TMS(2)	-14.3664	-9.37962	-9.82231	-15.9813	-12.9423	-13.4961	-10.662	-11.923	-11.0308	-13.2653	-10.4319	-11.9453	-12.2679	-13.6899	-14.0158		-11.1894	-14.1399	-11.2052	-11.8808	-13.3245		0.747477	0.0717357			1	5	2	3	4
Tyrosine-13C6-3TMS	-9.08554	-8.90802	-8.89938	-15.2297	-13.4312	-12.565	-11.1088	-10.9811	-11.4835	-9.65575	-9.47195	-9.58645	-13.2647	-14.0839	-14.7312		-8.96431	-13.742	-11.1912	-9.57138	-14.0266		4.99764	0	+		1	4	3	2	5
Tyrosine-3TMS	-7.82433	-7.13625	-7.09073	0.674217	0.831374	0.656134	0.72255	0.665794	0.750558	0.763498	-6.7993	-7.54221	0.192108	0.48436	0.440499		-7.35044	0.720575	0.712967	-4.526	0.372322		2.75218	0.000578616	+		5	1	2	4	3
Galacturonic acid-meto-5TMS(2)	-14.9388	-13.6679	-14.3851	-9.84003	-9.59745	-9.61047	-13.9885	-13.3951	-15.7409	-12.0179	-15.8984	-13.4607	-10.4133	-10.0323	-10.2304		-14.3306	-9.68265	-14.3748	-13.7923	-10.2253		3.3789	0.000111888	+		4	1	5	3	2
N6-Acetyllysine-2TMS	-8.15123	-7.85885	-7.83276	-7.88162	-7.74536	-7.86926	-7.89519	-8.01291	-8.03241	-7.86538	-7.88806	-7.64926	-8.15104	-7.75063	-7.59892		-7.94761	-7.83208	-7.98017	-7.8009	-7.83353		0.203359	0.466974			4	2	5	1	3
Epinephrine-4TMS	-7.99777	-7.67675	-7.94127	-12.3158	-9.95563	-9.99663	-6.55827	-13.559	-13.0497	-13.3753	-14.1805	-15.8107	-13.3233	-13.5539	-13.5614		-7.87193	-10.756	-11.0557	-14.4555	-13.4795		1.83845	0.00544681	+		1	2	3	5	4
1-Hexadecanol-TMS	-12.1058	-14.9767	-14.2124	-13.787	-12.8523	-13.8156	-14.7463	-12.8798	-13.4158	-13.1193	-12.3551	-13.3068	-11.2283	-12.4964	-14.462		-13.765	-13.485	-13.6806	-12.9271	-12.7289		0.13576	0.604599			5	3	4	2	1
Gluconic acid-6TMS	-9.55501	-9.94833	-9.98784	-9.77586	-9.94163	-9.62148	-9.02728	-9.35614	-9.25595	-3.05792	-3.20661	-3.12411	-13.3469	-14.8209	-16.222		-9.83039	-9.77966	-9.21312	-3.12955	-14.7966		7.64706	0	+		4	3	2	1	5
Tryptamine-2TMS	-10.0846	-9.6209	-10.4288	-10.9543	-11.0721	-11.3759	-10.2726	-10.4855	-10.9357	-10.5956	-10.3027	-9.75006	-12.0349	-12.7176	-12.3394		-10.0447	-11.1341	-10.5646	-10.2161	-12.364		4.1217	0	+		1	4	3	2	5
Indole-3-acetic acid-2TMS	-9.5274	-9.50735	-9.17453	-9.43183	-9.36938	-9.52797	-9.75682	-10.0318	-9.66439	-9.29564	-9.20926	-9.10182	-6.14085	-5.62834	-5.55465		-9.40309	-9.44306	-9.81765	-9.20224	-5.77461		8.92449	0	+		3	4	5	2	1
Pantothenic acid-3TMS	-7.66061	-7.53498	-7.40077	-7.50024	-7.40514	-7.54029	-7.95212	-7.92206	-7.93362	-7.66566	-7.57791	-7.6459	-6.42716	-6.32458	-6.4372		-7.53212	-7.48189	-7.93593	-7.62982	-6.39632		8.59149	0	+		3	2	5	4	1
Glucaric acid-6TMS	-10.6923	-11.2655	-10.365	-12.6553	-12.1829	-12.1797	-12.6924	-12.1122	-12.6898	-10.3185	-10.9101	-10.0216	-13.2258	-13.546	-12.7574		-10.7742	-12.3393	-12.4981	-10.4167	-13.1764		4.67844	0	+		2	3	4	1	5
Octopamine-4TMS	-12.5707	-12.8418	-13.1823	-12.1206	-11.8993	-12.0869	-11.3194	-12.3256	-11.7255	-13.0215	-12.2686	-12.9215	-12.7168	-14.119	-13.3486		-12.8649	-12.0356	-11.7902	-12.7372	-13.3948		2.04405	0.00353846	+		4	2	1	3	5
Xanthine-3TMS	-6.52583	-6.34382	-6.32039	-6.75534	-6.56343	-6.73832	-7.86373	-7.93777	-7.82902	-6.59765	-6.57753	-6.56445	-12.0659	-12.1478	-12.5181		-6.39668	-6.6857	-7.87684	-6.57988	-12.2439		12.3827	0	+		1	3	4	2	5
Urocanic acid-2TMS	-10.8656	-10.1191	-9.86084	-10.5393	-10.6788	-10.3189	-10.5926	-10.5573	-10.3227	-10.5689	-10.1924	-10.3734	-9.67116	-9.94946	-9.92355		-10.2818	-10.5123	-10.4909	-10.3782	-9.84806		1.08478	0.0288972	+		2	5	4	3	1
Palmitic acid-TMS	-4.7818	-4.81029	-4.09441	-4.60024	-3.79742	-4.71174	-4.22298	-3.51563	-4.71896	-4.39399	-4.48727	-4.58294	-3.67909	-4.10259	-3.61758		-4.56217	-4.3698	-4.15252	-4.48807	-3.79975		0.625914	0.096569			5	3	2	4	1
N-Acetylmannosamine-meto-4TMS(1)	-13.2427	-14.3324	-14.4591	-13.0134	-10.1774	-10.3141	-12.9921	-11.8013	-12.7573	-13.3051	-14.0672	-13.653	-13.9004	-13.3707	-12.1319		-14.0114	-11.1683	-12.5169	-13.6751	-13.1343		1.5592	0.00942132	+		5	1	2	4	3
Inositol-6TMS(2)	-1.78056	-1.68816	-1.72284	-3.20331	-3.03916	-3.15132	-2.00343	-2.02855	-1.98006	-1.80935	-1.73341	-1.75513	-6.44767	-6.3836	-6.4944		-1.73052	-3.13126	-2.00402	-1.76597	-6.44189		15.3267	0	+		1	4	3	2	5
Dopamine-4TMS	-10.0564	-9.59954	-9.42611	-9.70908	-10.0287	-10.0436	-9.65445	-9.7838	-9.15002	-10.4392	-9.9735	-10.2512	-9.51141	-8.88562	-8.36109		-9.69401	-9.92712	-9.52942	-10.2213	-8.91937		1.89901	0.00468449	+		3	4	2	5	1
Ribose 5-phosphate-meto-5TMS(1)	-9.5651	-9.10515	-9.17707	-9.03828	-8.98207	-9.21743	-9.16448	-6.59087	-9.05319	-9.12252	-9.10962	-9.30594	-9.29995	-9.0793	-9.13045		-9.28244	-9.07926	-8.26951	-9.17936	-9.1699		0.411208	0.182592			5	2	1	4	3
N-Acetylmannosamine-meto-4TMS(2)	-8.44314	-8.43356	-8.6904	-10.5402	-14.7339	-11.7733	-10.9939	-16.0328	-15.0015	-9.69137	-8.85852	-13.5119	-13.2248	-12.9891	-13.9277		-8.52237	-12.3491	-14.0094	-10.6873	-13.3806		1.48345	0.0109055	+		1	3	5	2	4
Ribose 5-phosphate-meto-5TMS(2)	-9.60607	-10.0422	-10.428	-10.5893	-9.88804	-9.99011	-9.02093	-8.93312	-8.72485	-10.1639	-9.91973	-10.0039	-10.5249	-10.0755	-10.0168		-10.0254	-10.1558	-8.89296	-10.0292	-10.2058		2.87578	0.000538462	+		2	4	1	3	5
Ribulose 5-phosphate-meto-5TMS(2)	-15.3928	-13.965	-15.2467	-11.8613	-12.8039	-13.0492	-10.4752	-10.9604	-10.4939	-12.7697	-13.0272	-12.5671	-12.3145	-11.9134	-12.3239		-14.8681	-12.5714	-10.6432	-12.788	-12.1839		4.74227	0	+		5	3	1	4	2
N-Acetyltyrosine-3TMS	-11.9858	-13.8695	-14.722	-14.4926	-15.5503	-12.691	-12.9822	-12.58	-13.298	-12.7386	-12.4867	-15.3794	-14.6357	-13.2915	-13.3709		-13.5257	-14.2446	-12.9534	-13.5349	-13.7661		0.111849	0.654734			2	5	1	3	4
Kynurenic acid-2TMS	-14.4466	-15.644	-15.9296	-10.8199	-10.4075	-10.5554	-11.485	-11.5314	-12.0673	-11.3769	-11.4885	-13.119	-7.29696	-7.18914	-7.31005		-15.3401	-10.5942	-11.6946	-11.9948	-7.26538		6.6445	0	+		5	2	3	4	1
Uric acid-4TMS	-9.47887	-11.0264	-10.8791	-10.9567	-11.0854	-11.3094	-12.2233	-11.7338	-12.1193	-8.39703	-8.26019	-8.23615	-7.3685	-7.23997	-7.18145		-10.4615	-11.1172	-12.0255	-8.29779	-7.26331		6.55241	0	+		3	4	5	2	1
Citrulline-3TMS	-10.6671	-10.6934	-10.6911	-10.0188	-10.3614	-9.88328	-10.9275	-10.9005	-10.9678	-10.7865	-11.3169	-10.3955	-12.7495	-12.3364	-11.8058		-10.6838	-10.0878	-10.932	-10.833	-12.2973		4.01856	0	+		2	1	4	3	5
Guanine-3TMS	-6.56201	-6.35725	-6.33394	-7.31631	-7.206	-7.3286	-9.48513	-9.48694	-9.31904	-8.16774	-8.03294	-8.11258	-10.7377	-10.3128	-10.4753		-6.41773	-7.28364	-9.43037	-8.10442	-10.5086		10.7538	0	+		1	2	4	3	5
Norepinephrine-5TMS	-7.24397	-6.95297	-6.86449	-7.40293	-7.02872	-7.08025	-6.82505	-6.698	-6.91114	-6.66825	-6.62033	-6.40314	-6.54661	-6.35463	-6.73713		-7.02048	-7.17063	-6.81139	-6.56391	-6.54612		2.3676	0.00171429	+		4	5	3	2	1
N-Acetyltyrosine-2TMS	-12.5446	-12.6266	-14.0966	-12.1803	-12.2515	-12.1224	-12.2543	-12.8482	-13.2137	-12.7419	-12.2965	-12.2408	-11.8679	-11.6903	-12.1324		-13.0893	-12.1847	-12.7721	-12.4264	-11.8969		1.12384	0.0264151	+		5	2	4	3	1
Margaric acid-TMS	-11.1177	-12.0594	-11.258	-11.7328	-11.5741	-12.173	-11.8499	-11.4849	-12.3104	-11.7845	-12.0981	-11.7984	-11.1888	-11.8028	-11.3664		-11.4784	-11.8266	-11.8818	-11.8937	-11.4527		0.399054	0.190629			2	3	4	5	1
Kynurenine-2TMS	-10.3272	-10.3087	-10.1373	-10.0254	-9.56611	-9.79094	-10.7741	-10.8726	-11.3099	-10.6949	-9.82252	-10.0052	-9.99492	-10.0037	-9.93402		-10.2577	-9.79415	-10.9855	-10.1742	-9.97755		2.56231	0.0011358	+		4	1	5	3	2
Octadecanol-TMS	-11.2422	-15.0938	-12.4863	-15.1291	-14.3992	-14.3565	-13.9255	-15.4347	-13.4358	-13.4338	-13.9947	-15.0999	-9.46477	-11.4533	-12.5052		-12.9408	-14.6283	-14.2654	-14.1762	-11.1411		1.37743	0.0143333	+		2	5	4	3	1
Kynurenine-3TMS	-11.9496	-12.7126	-11.9667	-11.7405	-11.0328	-11.3941	-11.873	-11.8173	-11.9321	-11.4005	-10.9113	-11.3973	-10.2293	-10.1941	-9.99892		-12.2096	-11.3891	-11.8741	-11.2364	-10.1408		4.26756	0	+		5	3	4	2	1
Cystamine-d8-nTMS	-11.2985	-10.837	-11.0716	-10.6763	-10.2666	-10.9446	-10.0102	-10.1113	-9.77962	-10.8419	-10.0534	-10.8035	-10.3476	-10.0493	-10.0875		-11.069	-10.6292	-9.96703	-10.5663	-10.1615		2.13472	0.00291525	+		5	4	1	3	2
Cystamine-nTMS	-6.31463	-6.17424	-6.31705	-6.12532	-5.9241	-6.39296	-5.83083	-6.00981	-5.6991	-6.18988	-5.78964	-6.1646	-6.33279	-5.93352	-5.86182		-6.26864	-6.14746	-5.84658	-6.04804	-6.04271		0.688306	0.0827863			5	4	1	3	2
7-Methylguanine-2TMS	-13.3756	-12.9146	-13.0556	-13.536	-12.8007	-13.2068	-14.2747	-14.0373	-13.9345	-12.5089	-12.3377	-12.5951	-12.2955	-12.4196	-12.4932		-13.1153	-13.1811	-14.0821	-12.4806	-12.4027		4.65276	0	+		3	4	5	2	1
Linoleic acid-TMS	-10.8531	-10.7918	-10.7937	-10.9027	-10.6444	-10.8899	-10.7169	-10.8707	-10.8836	-10.6622	-10.5944	-10.8296	-10.7253	-10.6407	-10.9152		-10.8129	-10.8123	-10.8237	-10.6954	-10.7604		0.199621	0.471206			4	3	5	1	2
Oleic acid-TMS	-9.49783	-10.216	-10.0575	-10.0615	-10.0045	-10.3126	-10.043	-9.90846	-10.4689	-10.2797	-10.2735	-10.2006	-9.97944	-10.0124	-9.9246		-9.92379	-10.1262	-10.1401	-10.2513	-9.97215		0.358559	0.224567			1	3	4	5	2
Tryptophan-3TMS	-0.921112	-0.505069	-0.420309	-1.03212	-1.01152	-1.10882	-1.26182	-1.4637	-1.08457	-0.880011	-0.560607	-0.899226	-4.4761	-3.83687	-3.57193		-0.615497	-1.05082	-1.27003	-0.779948	-3.96163		6.7904	0	+		1	3	4	2	5
Elaidic acid-TMS	-10.0791	-10.4073	-10.1734	-10.2371	-10.1859	-10.4674	-10.0835	-10.2009	-10.4939	-10.3632	-10.3896	-10.3729	-10.0497	-10.23	-9.98361		-10.2199	-10.2968	-10.2594	-10.3752	-10.0878		0.566253	0.112823			2	4	3	5	1
Tryptamine-3TMS	-9.04268	-9.03286	-8.92978	-11.2411	-10.5458	-11.2814	-11.4122	-11.3763	-10.3533	-10.2283	-10.265	-10.0421	-11.5206	-10.7226	-11.4014		-9.00177	-11.0228	-11.0472	-10.1785	-11.2149		3.78338	0	+		1	3	4	2	5
Stearic acid-TMS	-4.77806	-4.79189	-4.25962	-4.59928	-4.1343	-4.69867	-4.41012	-4.00409	-4.68864	-4.55229	-4.58361	-4.62612	-4.0137	-4.28135	-3.95773		-4.60986	-4.47741	-4.36762	-4.58734	-4.08426		0.791875	0.0641071			5	3	2	4	1
Fructose 1-phosphate-meto-6TMS(1)	-10.6783	-10.6459	-10.2153	-10.2065	-10.0583	-10.1199	-10.1363	-10.198	-10.337	-10.3395	-10.342	-10.291	-10.475	-10.1906	-10.3523		-10.5131	-10.1282	-10.2238	-10.3241	-10.3393		1.13385	0.0260664	+		5	1	2	3	4
Fructose 1-phosphate-meto-6TMS(2)	-10.5962	-10.351	-10.2304	-10.4314	-10.0088	-10.1328	-10.1764	-10.2239	-10.1624	-10.1585	-10.1593	-10.3469	-10.562	-10.2544	-10.1346		-10.3925	-10.191	-10.1876	-10.2216	-10.317		0.277294	0.346833			5	2	1	3	4
Fructose 6-phosphate-meto-6TMS	-14.5014	-13.9843	-12.4568	-10.4218	-10.4456	-10.1701	-13.6142	-12.4143	-12.6628	-14.5067	-15.939	-14.808	-14.5969	-13.7692	-13.5574		-13.6475	-10.3458	-12.8971	-15.0846	-13.9745		3.9832	0	+		3	1	2	5	4
Mannose 6-phosphate-meto-6TMS(1)	-11.4963	-10.9923	-11.258	-9.12991	-8.93435	-9.00244	-11.1901	-11.1636	-11.2107	-10.7767	-10.8048	-10.6859	-12.8617	-12.8378	-13.0887		-11.2489	-9.02223	-11.1881	-10.7558	-12.9294		9.64636	0	+		4	1	3	2	5
Glucose 6-phosphate-meto-6TMS(1)	-13.129	-14.4101	-12.9685	-7.05409	-6.9583	-6.94815	-8.32106	-8.30972	-8.27954	-7.88678	-7.83576	-7.73335	-14.7025	-14.6076	-15.4364		-13.5025	-6.98684	-8.30344	-7.81863	-14.9155		9.116	0	+		4	1	3	2	5
Mannose 6-phosphate-meto-6TMS(2)	-15.3576	-12.7968	-14.4281	-14.1411	-9.42185	-11.8682	-11.1901	-8.43493	-14.1473	-9.75177	-10.8048	-9.88555	-12.7194	-11.2583	-10.3985		-14.1942	-11.8104	-11.2574	-10.1474	-11.4587		0.745493	0.0717368			5	4	2	1	3
Metoprolol-2TMS	-11.1033	-14.8351	-11.4737	-14.0504	-10.8687	-12.9929	-14.1065	-14.9049	-11.5186	-11.4229	-11.2273	-14.684	-9.99748	-11.8981	-13.2479		-12.4707	-12.6374	-13.51	-12.4447	-11.7145		0.0856186	0.716636			3	4	5	2	1
Glucose 6-phosphate-meto-6TMS(2)	-16.0697	-14.1592	-14.7826	-9.34721	-9.39854	-9.34402	-10.6311	-8.32693	-10.68	-9.81653	-9.93567	-9.81922	-11.6904	-11.3166	-11.3091		-15.0038	-9.36326	-9.87934	-9.85714	-11.4387		4.72343	0	+		5	1	3	2	4
Inositol phosphate-7TMS	-12.5403	-13.0108	-12.4541	-13.5365	-14.0676	-13.7975	-13.4152	-14.0088	-14.3651	-14.0524	-12.9141	-13.7955	-13.4202	-14.0585	-13.7712		-12.6684	-13.8005	-13.9297	-13.5873	-13.7499		1.61913	0.00853886	+		1	4	5	2	3
Thymidine-2TMS	-14.9461	-13.1741	-15.8185	-11.2616	-14.2689	-10.4162	-15.0579	-13.1171	-12.992	-12.4084	-13.5545	-14.7233	-13.6224	-12.5937	-11.6299		-14.6462	-11.9822	-13.7223	-13.5621	-12.6153		0.632474	0.0951092			5	1	4	3	2
Uridine-4TMS	-11.1535	-9.99898	-9.79172	-15.1461	-12.593	-12.6235	-13.5898	-13.1394	-13.5813	-13.2977	-11.1201	-13.2876	-14.6708	-14.0226	-13.0794		-10.3147	-13.4542	-13.4368	-12.5685	-13.9242		2.06615	0.00333333	+		1	4	3	2	5
5-Methoxytryptamine-3TMS	-7.06317	-6.87134	-6.70727	-5.01775	-4.87258	-4.94339	-6.9117	-6.9749	-6.91765	-5.60545	-5.52347	-5.50527	-4.02867	-3.88387	-4.00162		-6.88059	-4.94457	-6.93475	-5.54473	-3.97139		10.8159	0	+		4	2	5	3	1
2'-Deoxyuridine-3TMS	-15.5059	-10.6805	-10.8685	-14.1896	-13.9561	-11.9962	-13.0816	-15.1078	-15.6116	-13.0077	-13.5033	-14.7059	-12.5747	-16.2282	-13.3563		-12.3516	-13.3806	-14.6003	-13.739	-14.0531		0.214624	0.446722			1	2	5	3	4
Saccharopine-4TMS	-10.6911	-10.553	-10.7081	-10.3025	-10.3756	-10.407	-10.8302	-10.9536	-10.6662	-10.5542	-10.0585	-10.2972	-9.74272	-10.0699	-9.97905		-10.6507	-10.3617	-10.8167	-10.3033	-9.93057		3.43903	8.57e-05	+		4	3	5	2	1
Uridine-3TMS	-6.85098	-7.12952	-7.04552	-10.7493	-10.5867	-10.4948	-10.543	-10.4817	-10.1315	-10.4494	-10.3888	-10.322	-10.9985	-10.4712	-10.6733		-7.00868	-10.6103	-10.3854	-10.3867	-10.7143		9.08619	0	+		1	4	2	3	5
5-Methoxytryptamine-2TMS	-7.35801	-6.24499	-7.29436	-6.47057	-7.03802	-6.66079	-6.85229	-7.26948	-7.00237	-6.13799	-6.33773	-6.53676	-7.03356	-6.86858	-6.80094		-6.96579	-6.72313	-7.04138	-6.33749	-6.90102		0.794454	0.0637489			4	2	5	1	3
Sedoheptulose 7-phosphate-meto-7TMS	-13.1709	-13.4002	-14.5788	-10.4993	-10.3208	-10.6313	-12.124	-12.2549	-11.7728	-11.97	-12.0516	-11.9192	-15.7065	-13.9355	-15.3634		-13.7166	-10.4838	-12.0505	-11.9803	-15.0018		4.79126	0	+		4	1	3	2	5
Inosine-4TMS	-14.2928	-11.9621	-13.3516	-11.8088	-12.2638	-14.3263	-15.0689	-14.4576	-16.2454	-12.1499	-15.666	-15.1702	-13.7517	-13.4279	-13.0919		-13.2022	-12.7996	-15.2573	-14.3287	-13.4238		0.725198	0.0753043			2	1	5	4	3
Docosahexaenoic acid-TMS	-11.7678	-11.5673	-11.6836	-11.4111	-11.5527	-11.3682	-12.0795	-11.6074	-11.9539	-11.7491	-11.6239	-11.6515	-11.5059	-11.5527	-11.4107		-11.6729	-11.444	-11.8803	-11.6749	-11.4898		1.77501	0.00605291	+		3	1	5	4	2
Sucrose-8TMS	-1.27517	-1.15633	-1.1611	-5.7431	-5.9522	-5.87538	-1.26061	-1.30243	-1.24048	-7.75821	-8.08134	-8.10937	-9.54957	-10.1374	-9.72326		-1.19753	-5.85689	-1.26784	-7.98297	-9.8034		13.2059	0	+		1	3	2	4	5
Docosapentaenoic acid-TMS	-12.5031	-12.4707	-12.3523	-13.0298	-13.703	-12.551	-12.4212	-12.4855	-12.3125	-13.0016	-14.1426	-12.6585	-14.2904	-13.8533	-14.1528		-12.442	-13.0946	-12.4064	-13.2676	-14.0988		2.27716	0.00205848	+		2	3	1	4	5
Adenosine-4TMS	-4.00267	-3.80976	-3.78339	-8.47893	-8.33955	-8.39677	-11.1896	-11.097	-11.077	-9.53589	-9.30431	-9.48886	-11.2939	-11.0769	-11.0481		-3.86528	-8.40508	-11.1212	-9.44302	-11.1396		14.1367	0	+		1	2	4	3	5
Lactose-meto-8TMS(1)	-9.38609	-9.47523	-9.49678	-9.34614	-8.95733	-8.94596	-9.42448	-9.18585	-9.46109	-9.22445	-9.07568	-9.12948	-9.12988	-9.06461	-9.33651		-9.4527	-9.08314	-9.35714	-9.14321	-9.177		1.31115	0.0171208	+		5	1	4	2	3
Lactose-meto-8TMS(2)	-9.38609	-10.6723	-9.49678	-10.1548	-9.9545	-9.97548	-12.6191	-11.7518	-10.2754	-11.279	-11.9613	-11.5881	-10.188	-10.0806	-9.93318		-9.85173	-10.0283	-11.5487	-11.6094	-10.0673		1.91057	0.00462366	+		1	2	4	5	3
Xanthosine-5TMS	-12.5285	-12.3026	-12.0294	-12.2189	-12.0854	-12.2635	-14.604	-14.4299	-13.5235	-14.1327	-12.9295	-14.5312	-13.944	-13.834	-14.1535		-12.2868	-12.1893	-14.1858	-13.8645	-13.9772		3.20434	0.000190476	+		2	1	5	3	4
Batyl alcohol-2TMS	-9.33781	-10.3103	-11.7798	-11.8843	-9.81749	-12.5207	-9.94885	-11.4585	-9.55908	-13.4606	-9.69476	-11.7782	-12.1132	-12.3675	-9.81084		-10.476	-11.4075	-10.3222	-11.6445	-11.4305		0.154182	0.565471			2	3	1	5	4
Maltose-meto-8TMS(1)	-7.83152	-7.75171	-7.65582	-11.604	-11.7168	-10.8391	-7.78031	-7.77206	-7.77382	-7.66136	-7.48986	-7.56809	-11.9131	-13.6005	-6.97224		-7.74635	-11.3866	-7.7754	-7.5731	-10.8286		1.5754	0.00910204	+		2	5	3	1	4
Trehalose-8TMS	0.720037	0.79736	0.783754	-5.56157	-5.45205	-5.54428	-6.28385	-6.3578	-6.2897	-6.65939	-6.43797	-6.61467	-9.38286	-9.64149	-9.62111		0.76705	-5.5193	-6.31045	-6.57068	-9.54849		15.823	0	+		1	2	3	4	5
Cytidine-4TMS	-4.91589	-4.75289	-4.77362	-10.5323	-10.551	-10.353	-12.0113	-10.8886	-12.1991	-12.1513	-11.9326	-12.093	-14.5053	-15.0362	-14.2656		-4.81414	-10.4788	-11.6997	-12.059	-14.6024		9.54068	0	+		1	2	3	4	5
Lactitol-9TMS	-8.98659	-8.79966	-8.54514	-7.46534	-7.31678	-7.43639	-7.38437	-7.46912	-7.38715	-8.25972	-7.88816	-8.06195	-7.91708	-7.73711	-7.77761		-8.77713	-7.40617	-7.41354	-8.06995	-7.8106		5.75516	0	+		5	1	2	4	3
Maltose-meto-8TMS(2)	-9.1152	-13.1423	-14.3744	-13.5186	-14.8056	-14.3833	-9.94151	-15.2752	-18.2417	-7.0815	-7.13538	-7.07989	-13.983	-12.8192	-10.7117		-12.2106	-14.2358	-14.4861	-7.09892	-12.5046		1.65986	0.00793684	+		2	4	5	1	3
Spermine-6TMS	-5.23325	-5.12195	-5.14921	-4.89738	-4.79392	-5.08045	-5.30828	-5.50944	-5.09087	-5.39527	-4.95122	-5.38711	-5.53748	-5.14361	-5.00747		-5.16814	-4.92392	-5.30286	-5.24453	-5.22952		0.591053	0.106241			2	1	5	4	3
Guanosine-5TMS	-9.62936	-9.35348	-9.35324	-11.4359	-11.6788	-11.7271	-14.4808	-13.8415	-14.7413	-17.1449	-12.5362	-14.4978	-13.8284	-13.5875	-16.0121		-9.44536	-11.6139	-14.3545	-14.7263	-14.476		2.94252	0.000450331	+		1	2	3	5	4
Monostearin-2TMS	-11.6983	-12.0956	-10.1343	-12.3542	-9.24218	-10.9557	-11.8823	-9.93886	-11.1742	-11.6468	-8.61533	-9.31597	-11.0574	-11.0258	-10.7142		-11.3094	-10.8507	-10.9985	-9.85938	-10.9325		0.190679	0.487316			5	2	4	1	3
Isomaltose-meto-8TMS(2)	-9.08583	-8.97437	-8.73538	-11.2616	-10.6037	-9.83949	-10.1915	-8.62711	-8.63758	-8.83004	-8.66283	-8.931	-12.99	-14.6045	-12.2562		-8.93186	-10.5683	-9.15208	-8.80796	-13.2836		3.94319	0	+		2	4	3	1	5
